1 **Titles:** Robustness encoded across essential and accessory replicons in an ecologically versatile

2 bacterium

3

4 **Running title:** Genome effects on gene essentiality

5

6 **Authors:** George C diCenzo<sup>1\*</sup>, Alex B Benedict<sup>2</sup>, Marco Fondi<sup>1</sup>, Graham C Walker<sup>3</sup>, Turlough

7 M Finan<sup>4</sup>, Alessio Mengoni<sup>1</sup>, Joel S Griffitts<sup>2</sup>

8

9 **Affiliations:** <sup>1</sup> Department of Biology, University of Florence, Sesto Fiorentino, FI, 50019, Italy.

10 <sup>2</sup> Department of Microbiology and Molecular Biology, Brigham Young University, Provo, UT,  
11 84602, USA.

12 <sup>3</sup> Department of Biology, Massachusetts Institute of Technology, Cambridge, MA, 02139, USA.

13 <sup>4</sup> Department of Biology, McMaster University, Hamilton, ON, L8S 4K1, Canada.

14

15 **\* Corresponding author:** George C diCenzo

16 Department of Biology

17 University of Florence

18 Sesto Fiorentino, FI, 50019

19 Italy

20 Email: georgecolin.dicenzo@unifi.it

21

22 **Keywords:** genetic interactions / synthetic lethality / systems biology / Tn-seq / constraint based

23 modelling

25  
26  
27  
28  
29  
30  
31  
32  
33  
34  
35  
36  
37  
38  
39  
40  
41  
42  
43

## ABSTRACT

Bacterial genome evolution is characterized by gains, losses, and rearrangements of functional genetic segments. The extent to which genotype-phenotype relationships are influenced by large-scale genomic alterations has not been investigated in a high-throughput manner. In the symbiotic soil bacterium *Sinorhizobium meliloti*, the genome is composed of a chromosome and two large extrachromosomal replicons (pSymA and pSymB, which together constitute 45% of the genome). Massively parallel transposon insertion sequencing (Tn-seq) was employed to evaluate contributions of chromosomal genes to fitness in both the presence and absence of these extrachromosomal replicons. Ten percent of chromosomal genes from diverse functional categories are shown to genetically interact with pSymA and pSymB. These results demonstrate the pervasive robustness provided by the extrachromosomal replicons, which is further supported by constraint-based metabolic modelling. A comprehensive picture of core *S. meliloti* metabolism was generated through a Tn-seq-guided *in silico* metabolic network reconstruction, producing a core network encompassing 726 genes. This integrated approach facilitated functional assignments for previously uncharacterized genes, while also revealing that Tn-seq alone misses over a quarter of wild type metabolism. This work highlights the strong functional dependencies and epistatic relationships that may arise between bacterial replicons and across a genome, while also demonstrating how Tn-seq and metabolic modelling can be used together to yield insights not obtainable by either method alone.

44

## INTRODUCTION

45           The prediction of genotype-phenotype relationships is a fundamental goal of genetic,  
46 biomedical, and eco-evolutionary research, and this problem underpins the design of synthetic  
47 microbial systems for biotechnological applications [1]. The last decades have witnessed a shift  
48 away from the functional characterization of single genes towards whole-genome, systems-level  
49 analyses [for recent reviews, see [2,3]]. Such studies have been facilitated by the development of  
50 methods that allow for the direct interrogation of a genome to determine all genetic elements  
51 required for adaptation to a specified environment. Two primary methods are *in silico* metabolic  
52 modelling [4,5], and massively parallel sequencing of transposon insertions in bacterial mutant  
53 libraries (Tn-seq) [6,7].

54           The process of *in silico* genome-scale metabolic modelling consists of two stages. First, a  
55 reconstruction of all cellular metabolism is built that contains all reactions expected to be  
56 present, as well as which genes encode the enzymes performing each reaction, thereby linking  
57 genetics to metabolism [8]. Next, mathematical models such as flux balance analysis (FBA) are  
58 used to simulate the flux distribution through the reconstructed metabolic network [9], which can  
59 be used to predict how environmental perturbations or gene disruptions influence growth  
60 phenotypes. This approach allows for phenotypic predictions of all possible single, double, or  
61 higher-order gene deletion mutations within a matter of days [10,11], something that is infeasible  
62 using a direct experimental approach. However, the quality of the predictions is highly  
63 dependent on the accuracy of the metabolic reconstruction. Outside of a few model species like  
64 *Escherichia coli*, experimental genetic and biochemical data are not available at the resolution  
65 necessary to provide accurate assignment of all metabolic gene functions.

66           The Tn-seq approach involves the generation of a library of hundreds of thousands of  
67 mutant clones, each containing a single transposon insertion at a random genomic location [12].  
68 The library of pooled clones is then cultured in the presence of a defined environmental  
69 challenge. Insertions resulting in altered fitness in the environment under investigation become  
70 under- or over-represented in the population, and this is monitored by deep sequencing to  
71 identify the genomic location and frequency of all transposon insertions. This approach is  
72 imperfect, as important biochemical functions may be encoded redundantly in the genome [13-  
73 15], and the loss of some essential genes can be compensated for by evolution of alternative  
74 cellular processes [16]. Moreover, fitness changes brought about by mutation in one gene may be  
75 dependent on mutation of a second gene bearing no resemblance to the first—a phenomenon  
76 known as a genetic interaction [17,18]. Such genetic interactions may cause the apparent  
77 functions of some genes to be strictly dependent on their genomic environment [19]. In other  
78 words, a gene may be essential for growth in one organism, but its orthologous counterpart in  
79 another organism may be non-essential. This significantly complicates efforts to generalize  
80 genotype-phenotype relationships [20].

81           Resolving the problem of genome-conditioned gene function is of broad significance in  
82 the areas of functional genomics, population genetics, and synthetic biology. For example, the  
83 ability to design and build optimized minimal cell factories on the basis of single-mutant fitness  
84 data is expected to present numerous complications [21], as evidenced by the recent effort to  
85 rationally build a functional minimal genome [22]. Tn-seq studies have suggested there is as  
86 little as 50% to 25% overlap in the essential genome of any two species [23-25]. As a striking  
87 example, 210 of the Tn-seq determined essential genes of *Pseudomonas aeruginosa* PA14 are  
88 not even present in the genome of *P. aeruginosa* PAO1 [26]. Comparison of Tn-seq data for

89 *Shigella flexneri* with the deletion analysis data for closely related *E. coli* suggested only a small  
90 number of genes were specifically essential in one species. Mutation of about 100 genes,  
91 however, appeared to result in a growth rate decrease specifically in *E. coli* [27]. Similarly,  
92 comparison of Tn-seq datasets from two *Salmonella* species revealed that mutation of nearly 40  
93 genes had a stronger growth phenotype in one of the two species [28]. Overall, these studies  
94 suggest that the genomic environment (here defined as the genomic components that may vary  
95 from organism to organism) influences the fitness contributions of a significant proportion of an  
96 organism's genes. However, no large-scale analysis has been performed that directly illustrates  
97 how the phenotypes of individual genes are impacted when a small or large part of the genome is  
98 modified.

99         Here, we provide a quantitative, genome-scale evaluation of how large-scale genomic  
100 variance influences genotype-phenotype relationships. We have accomplished this in a way that  
101 minimizes the effects of laboratory-to-laboratory variation, and removes the effects of complex  
102 genome evolution. The model system used is *Sinorhizobium meliloti*, an  $\alpha$ -proteobacterium  
103 whose 6.7-Mb genome consists of a chromosome and two additional replicons, the pSymA  
104 megaplasmid and the pSymB chromid. The pSymA and pSymB replicons constitute 45% of the  
105 *S. meliloti* genome (~2,900 genes); yet, by simply transferring only two essential genes from  
106 pSymB to the chromosome, both pSymA and pSymB can be completely removed from the  
107 genome, yielding a viable single-replicon organism [29]. We report a comparison of gene  
108 essentiality (via Tn-seq) for wild-type *S. meliloti* and the single-replicon derivative. This analysis  
109 was supplemented by an *in silico* double gene deletion analysis of a *S. meliloti* genome-scale  
110 metabolic network reconstruction. We further examine how integration of Tn-seq data with *in*  
111 *silico* metabolic modelling, through a Tn-seq-guided reconstruction process, overcomes the

112 limitations of using either of these approaches in isolation to develop a consolidated view of the  
113 core metabolism of the organism. This process produced a fully referenced *core S. meliloti*  
114 metabolic reconstruction.

115

## 116 **RESULTS**

### 117 **Development and validation of the Tn5-based transposon Tn5-714.**

118 In order to interrogate the *S. meliloti* genome using a Tn-seq based approach, we first  
119 developed a new construct based on the Tn5 transposon as described in the Materials and  
120 Methods. The resulting transposon (Figure S1) contains constitutive promoters reading out from  
121 both ends of the transposon to ensure the production of non-polar mutations. Analysis of the  
122 insertion site locations validated that the transposon performed largely as expected. Gene  
123 disruptions caused by transposon insertions were confirmed to be non-polar as illustrated by the  
124 case reported in Figure 1, and there was no strong bias in the distribution of insertions around the  
125 chromosome (Figures 2A, S2). However, there did appear to be somewhat of a bias for  
126 integration of the transposon in GC rich regions (Figure S3). Given the high GC content (62.7%)  
127 of the *S. meliloti* chromosome, it is unlikely that this moderate bias had a discernable influence  
128 on the results of this study.

### 129 **Overview of the Tn-seq output.**

130 The Tn-seq experiments reported here were undertaken with two primary aims: i) to  
131 identify the core set of genes contributing to *S. meliloti* growth in laboratory conditions, and ii) to  
132 determine the extent to which the phenotypic consequence of a gene deletion is influenced by the  
133 genomic environment (i.e. presence/absence of the secondary replicons). To accomplish this, Tn-  
134 seq libraries of two *S. meliloti* strains were prepared: a wild type strain (designated RmP3499)

135 containing the entire genome, and a strain with both the pSymA and pSymB replicons removed  
136 (designated RmP3496 or  $\Delta$ pSymAB; strains described previously in [30]). Transposon library  
137 sizes were skewed to compensate for the difference in genome sizes, resulting in nearly identical  
138 insertion site density for each library (Table S1). Both libraries were passed through selective  
139 growth regimens in either complex BRM broth (rich medium) or minimal VMM broth (defined  
140 medium) in duplicates. Following approximately nine generations of growth, the location of the  
141 transposon insertions in the population was determined, a gene essentiality index (GEI) was  
142 calculated for all chromosomal genes, and each gene was classified into one of five fitness  
143 categories (Table 1) using the procedure described in the Materials and Methods. Four genes  
144 (*pdxJ*, *fumC*, *smc01011*, *smc03995*), including two of unknown function, were independently  
145 mutated in the wild-type background, and in all cases, the mutations yielded the expected no-  
146 growth phenotype (Figure S4), supporting the accuracy of the Tn-seq output. All Tn-seq data is  
147 available as Data Set S1.

148 A strong correlation was observed between the number of insertions per gene in each set  
149 of duplicates (Figure S5), indicating that there was high reproducibility of the results and that  
150 differences between conditions were unlikely to reflect random fluctuations in the output. On  
151 average, insertions were found in 190,000 unique chromosomal positions with a median of 39  
152 unique insertion positions per gene (Table S1). The similarity in the number of unique insertion  
153 positions between samples suggested that differences in the Tn-seq outputs were also unlikely to  
154 be an artefact of the quality of the libraries.

### 155 **Elucidation of the core genetic components of *S. meliloti*.**

156 There were 307 genes classified as essential independently of growth medium or strain  
157 (Figure S6). This set of 307 genes includes those encoding functions commonly understood to be

158 essential: the DNA replication apparatus, the four RNA polymerase subunits, the housekeeping  
159 sigma factor, the general transcriptional termination factor Rho, 40 out of 55 of the annotated  
160 ribosomal protein subunits, 18 out of 20 of the annotated aminoacyl-tRNA synthetases, and 6 out  
161 of 10 of the annotated ATP synthase subunits. Considering genes classified as essential plus  
162 those genes whose mutation resulted in a large growth defect (Groups I and II in Table 1), a core  
163 growth promoting genome of 489 genes, representing ~ 15% of the chromosome, was identified  
164 (Figure 2B). This expanded list includes 51 out of 55 of the annotated ribosomal protein  
165 subunits, 19 out of 20 of the annotated aminoacyl-tRNA synthetases, and 9 out of 10 of the  
166 annotated ATP synthase subunits. These 489 genes appeared to be mostly dispersed around the  
167 chromosome, although there was a bias for these genes to be found in the leading strand (Figure  
168 2A). Based on published RNA-seq data for *S. meliloti* grown in a glucose minimal medium,  
169 these 489 genes tend to be highly expressed, with a median expression level above the 90%  
170 percentile (Figure S7). Compared to the entire chromosome (Fisher exact test, p-value < 0.05  
171 following a Bonferroni correction for 18 tests), this set of 489 genes was enriched for genes  
172 involved in translation (5.2-fold), lipid metabolism (2.7-fold), cofactor metabolism (3.3-fold),  
173 and electron transport (2.1-fold), whereas genes involved in transport (2.1-fold),  
174 motility/attachment (9.4-fold), and hypothetical genes (2.7-fold) were under-represented (Figure  
175 2C). Additionally, cell wall (2.2-fold) and cell division (2.3-fold) were over-represented while  
176 transcription (1.9-fold) was under-represented (Figure 2C), although these differences were not  
177 considered statistically significant.

178 A clear influence of the growth medium on the fitness phenotypes of gene mutations was  
179 observed. The degree to which mutant phenotypes were impacted by growth medium type is  
180 reflected in the synthetic medium index (SMI) calculated as described in the Materials and



181 Methods. Focusing on the wild-type strain, a core of 519 genes were identified as contributing  
182 equally to growth in both media (Figure 2D). Forty genes were identified as more important  
183 during growth in rich medium than in defined medium, and these genes had a median SMI score  
184 of 7 (values of 1 and -1 are neutral). Only translation functions (5.8-fold) displayed a statistically  
185 significant enrichment in these genes, which may reflect the faster growth rate in the rich  
186 medium (Figure S8), while there was also a non-statistically significant enrichment in signal  
187 transduction (5.1-fold) (Figure 2C). The extent of specialization for growth in the defined  
188 medium was more pronounced; 93 genes were more important during growth in the defined  
189 medium with a median SMI score of -20. These genes were enriched (statistically significant) in  
190 amino acid (9.0-fold) and nucleotide (6.7-fold) metabolism presumably due to the requirement of  
191 their biosynthesis, and carbohydrate metabolism (3.6-fold) likely as the sole carbon source was a  
192 carbohydrate (Figure 2C). The same overall pattern was observed between media for the  
193  $\Delta$ pSymAB strain (Figure S9).

#### 194 **Mutant fitness phenotypes are strongly influenced by their genomic environment.**

195 The Tn-seq data sets for the wild-type and the  $\Delta$ pSymAB strains were compared to  
196 evaluate the robustness of the observed fitness phenotypes in response to changes in the gene's  
197 genomic environment. Similar results were observed for both growth media, suggesting that the  
198 results were generalizable and not medium specific. Depending on the medium, either 484 or 488  
199 genes had an equal contribution to growth in both strains, 81 or 89 genes led to stronger growth  
200 impairment when mutated in wild-type cells, and either 250 or 251 genes led to stronger growth  
201 impairment when mutated in  $\Delta$ pSymAB cells (Figures 2E, 2F, and Table 2). Only minor  
202 functional bias was observed in the genes that displayed larger fitness defects in the  $\Delta$ pSymAB  
203 background (Figure 2C); in both media, only electron transport (3-fold) and oxidoreductases

204 (9.5-fold) were over- and under-represented, respectively. Similarly, little functional bias was  
205 detected in genes with larger fitness defects in the wild-type background (Figure 2C); in both  
206 media, lipid metabolism (4.5-fold) and hypothetical genes (2-fold) were over- and under-  
207 represented, respectively, while nucleotide metabolism (5.5-fold) was also enriched in the rich  
208 medium. Overall, these results were consistent with pervasive effects of the genomic  
209 environment on the genotype-phenotype relationship that was largely independent of the  
210 biological role of the gene products.

211       Approximately half (9 of 16) of the genes that were independently mutated in both strains  
212 yielded the expected phenotypes on rich agar plates (Figures S10). Of the other seven genes,  
213 which were expected to be essential specifically in the  $\Delta$ pSymAB strain, at least three were non-  
214 lethal but displayed obvious growth rate defects or extended lag phases during liquid culture  
215 experiments (Table S2 and Figure S11). The remaining three genes may represent false positives  
216 from the Tn-seq screen, or may reflect differences in the growth conditions, namely, competitive  
217 growth versus isogenic growth. Nevertheless, the observation that at least 75% of the selected  
218 genes were confirmed to have a genome content-dependent fitness phenotype validates that the  
219 large majority of the strain specific phenotypes observed in the Tn-seq screen represent true  
220 differences.

### 221 **Level of genetic and phenotypic conservation of the essential *S. meliloti* genes.**

222       Several recent studies have used Tn-seq to study the essential genome of *Rhizobium*  
223 *leguminosarum* [31-33]. We compared our Tn-seq datasets with those reported in by Perry *et al*  
224 [32] to examine the conservation of the essential genome of these two closely related N<sub>2</sub>-fixing  
225 species. Putative orthologs for ~ 75% of all *S. meliloti* chromosomal genes were identified in *R.*  
226 *leguminosarum* via a Blast Bidirectional Best Hit (Blast-BBH) approach (Data Set S2). Much

227 higher conservation of the growth promoting genome was observed; 97% of the 489 core growth  
228 promoting genes and 99% of the 307 core essential genes had a putative ortholog in *R.*  
229 *leguminosarum*. However, conservation of the gene did not necessarily correspond to  
230 conservation of the phenotype. Considering only the 303 conserved core essential *S. meliloti*  
231 genes (as these were the least likely to have been falsely identified as essential), 8% (25 of 303)  
232 of their orthologous genes were classified as having little contribution to growth on defined  
233 medium in *R. leguminosarum* (Figure 3A). An additional 34 genes were considered to be non-  
234 essential but growth defective when mutated (Figure 3A). Independent mutation of two genes  
235 (*fumC*, *pdxJ*) identified as specifically essential in *S. meliloti* confirmed their essentiality (Figure  
236 S4), supporting the Tn-seq data. A similar pattern is observed starting with the *R. leguminosarum*  
237 genes classified as essential in both minimal and complex medium by Perry *et al.* [32]. Of the  
238 241 core essential *R. leguminosarum* genes with an ortholog on the *S. meliloti* chromosome, 21  
239 (9%) of the orthologs were classified as non-essential in *S. meliloti* for growth in defined  
240 medium, while an additional 8 were considered to have a moderate growth defect (Figure 3B).

241 To further test the species specificity of the above-mentioned genes, the experiment was  
242 replicated *in silico*. Fifteen of the 25 orthologs specifically essential in *S. meliloti* were present  
243 both in our existing *S. meliloti* genome-scale metabolic model [34] as well as in a draft *R.*  
244 *leguminosarum* metabolic model (see Materials and Methods). Flux balance analysis was used to  
245 examine the *in silico* effect of deleting these 15 pairs of orthologs on growth. Three pairs of  
246 orthologs were classified as essential in both models, five were classified as non-essential in both  
247 models, and seven were classified as essential specifically in the *S. meliloti* model. Thus, at least  
248 half of the gene essentiality differences observed in the Tn-seq data are corroborated by the *in*  
249 *silico* metabolic simulation, despite the preliminary nature of the draft *R. leguminosarum* model.

250 An *in silico* analysis of the genes identified as specifically essential in *R. leguminosarum* on the  
251 basis of the Tn-seq data was not performed as only two of these genes were present in the *R.*  
252 *leguminosarum* model.

253 ***In silico* analyses support a high potential for genetic redundancy in the *S. meliloti* genome.**

254 The results of the previous two sections are consistent with a strong genomic  
255 environment effect on the phenotypic consequences of gene mutations. One possible explanation  
256 is the presence of widespread genetic redundancy, at the gene and/or pathway level. In support of  
257 this, ~ 14% of chromosomal genes had a Blast-BBH hit when the chromosomal proteome was  
258 compared against the combined pSymA/pSymB proteome (Data Set S3). Therefore, this  
259 phenomenon was further explored using a constraint-based metabolic modelling approach.

260 We first tested the *in silico* effect of chromosomal single gene deletions on growth rate in  
261 the presence and absence of pSymA/pSymB (Figure 4A). This analysis identified 67 genes (~  
262 7% of all chromosomal model genes) as having a more severely impaired growth phenotype  
263 when deleted in the absence of pSymA/pSymB genes, 38 of which were lethal. This appeared to  
264 be due to a combination of direct functional redundancy of the gene products as well as through  
265 metabolic bypasses, as deletion of 50 reactions dependent on chromosomal genes had a more  
266 severe phenotype in the absence of pSymA/pSymB, 42 of which were lethal (Figure S12).

267 Next, a double gene deletion analysis was performed to examine the effect on growth rate  
268 of deleting every possible pair of model genes. This analysis suggested that 49 chromosomal  
269 genes had a more significant impact on growth than expected when simultaneously deleted with  
270 a single pSymA or pSymB gene (Figure 4B). Additionally, synthetic negative phenotypes were  
271 observed for 97 chromosomal genes when simultaneously deleted with another chromosomal  
272 gene (Figure 4C). Overall, 14% of chromosomal genes were predicted to have a synthetic

273 negative phenotype when co-deleted with a second gene, consistent with a high potential for  
274 metabolic robustness being encoded by the *S. meliloti* genome, and with a significant influence  
275 of the genomic environment on the fitness phenotype of gene mutations.

276 **A consolidated view of core *S. meliloti* metabolism through Tn-seq-guided *in silico***  
277 **metabolic reconstruction.**

278 The results described in the previous sections made it evident that a Tn-seq approach  
279 alone is insufficient to elucidate all processes contributing to growth in a particular environment.  
280 This is especially true if also considering non-essential metabolism that is nevertheless actively  
281 present in wild type cells, such as exopolysaccharide production. Moreover, it is difficult to fully  
282 comprehend the core functions of a cell by simply examining a list of essential genes and their  
283 predicted functions. We therefore attempted to overcome these limitations by using the Tn-seq  
284 data to guide a manual *in silico* reconstruction of the core metabolic processes of *S. meliloti*. A  
285 detailed description of this process is provided in the Materials and Methods. In brief, the  
286 existing metabolic model iGD1575 was treated as a database of reactions and gene-reaction  
287 associations. Each pathway involved in central carbon metabolism or the production of essential  
288 or non-essential biomass components (Table S3) were then rebuilt in a new (initially empty)  
289 reconstruction drawing from the reactions present in iGD1575. At the same time, the genes  
290 associated with each reaction were compared to the Tn-seq data and published literature to  
291 confirm the linkage of the correct gene(s) to each reaction.

292 The resulting model, termed iGD726 and included as in SBML format in File S2, is  
293 summarized in Figure 5 and Table 3, and the entire model including genes, reaction formulas,  
294 and references is provided as an easy to read Excel table in Data Set S4. The process of  
295 integrating the Tn-seq data with *in silico* metabolic reconstruction resulted in a major refinement

296 of the core metabolism compared to the existing genome-scale model: 228 new reactions were  
297 added, 115 new genes were added, and the genes associated with 135 of the 432 reactions  
298 common to both reconstructions were updated. In addition to improving the metabolic  
299 reconstruction, this process significantly expanded the view of core *S. meliloti* metabolism  
300 compared to that gained solely through the application of Tn-seq. The genes associated with  
301 approximately one third of the iGD726 reactions were not detected as growth promoting in the  
302 Tn-seq datasets (Figure 5, Table 3). While many of the additional reactions present in iGD726  
303 are due to the inclusion of non-essential biomass components, which are part of the wild type  
304 cell but are nonetheless dispensable for growth, others are from essential metabolic pathways  
305 (Figures 5, S13). Overall, the combined approach of integrating Tn-seq data and *in silico*  
306 metabolic modelling allowed for the development of a high-quality representation of core *S.*  
307 *meliloti* metabolism in a way that neither approach alone was capable of accomplishing.

### 308 **Tn-seq-guided *in silico* metabolic reconstruction facilitates novel gene annotation.**

309 Over 20 of the reactions of the core metabolic reconstruction initially had no gene  
310 attributed with producing the enzyme responsible for its catalysis. Similarly, many genes with no  
311 clear biological function were found to be essential in the Tn-seq screen. By attempting to fill the  
312 gaps in the *in silico* model with the uncharacterized essential genes, we were able to assign  
313 putative functions to eight previously uncharacterized genes (Table S4). Two of these genes were  
314 chosen for further characterization, *smc01361* and *smc04042*. The *smc01361* gene was annotated  
315 as encoding a dihydroorotase, and mutation of *smc01361* resulted in pyrimidine auxotrophy  
316 (Figure S14). Given its location next to *pyrB*, and the presence of an essential PyrC  
317 dihydroorotase encoded elsewhere in the genome (Data Set S1), we propose that *smc01361*  
318 encodes an inactive dihydroorotase (PyrX) required for PyrB activity as has been observed in

319 some other species including *Pseudomonas putida* [35,36]. The essential *smc04042* gene was  
320 annotated as an inositol-1-monophosphatase family protein. It was previously observed that  
321 rhizobia lack a gene encoding a classical L-histidinol-phosphate phosphohydrolase, and it was  
322 suggested an inositol monophosphatase family protein may fulfill this function instead [37].  
323 Mutation of *smc04042* resulted in histidine auxotrophy (Figure S14), consistent with this enzyme  
324 fulfilling the role of a L-histidinol-phosphate phosphohydrolase. It is likely that this is true for  
325 most rhizobia, as putative orthologs of this gene were identified in all 10 of the examined  
326 Rhizobiales genomes (Data Set S4). These examples illustrate the power of the combined Tn-seq  
327 and metabolic reconstruction process in the functional annotation of bacterial genomes.

328

329

## DISCUSSION

330 In this study, we developed a new variant of the Tn5 transposon for construction of non-  
331 polar insertion mutations that should be readily adaptable for use with other  $\alpha$ -proteobacteria.  
332 The Tn5 transposon was chosen as it was expected to have low insertion site specificity in *S.*  
333 *meliloti* [38]. However, we observed a moderate sequence insertion bias for GC rich regions  
334 consistent with previous studies of the Tn5 transposon [39-41]. The consensus sequence of ~  
335 190,000 unique insertion locations was largely consistent, but not identical, with that previously  
336 reported [41]; however, the specificity appeared to extend past the 9 base pair region that is  
337 duplicated during Tn5 insertion (Figure S3). While this bias is unlikely to have a significant  
338 influence on the results in species with high GC content genomes, such as *S. meliloti*, accounting  
339 for this bias may be important when applying Tn5 mutagenesis to species with low GC content  
340 genomes.

341 Greater than 10% of species with a sequenced genome contain a genomic architecture  
342 similar to *S. meliloti*, that is, with at least two large DNA replicons [42,43]. Several studies have  
343 revealed that, in many ways, each replicon acts as a functionally and evolutionarily distinct entity  
344 (for a review, refer to [43]); yet, there can also be regulatory cross-talk [44], as well as the  
345 exchange of genetic material between the replicons [45]. The Tn-seq analyses reported here  
346 provide new insights into the functional integration of secondary replicons into the host  
347 organism. The pSymB replicon of *S. meliloti* is known to have two essential genes (which were  
348 transferred to the chromosome for this study) [45], while pSymA has no essential genes [46].  
349 However, the large number of chromosomal genes—across many functional groups (Figure 2)—  
350 that became conditionally essential following the removal of pSymA and pSymB indicate the  
351 presence of many genes whose products can perform essential metabolic capabilities but that  
352 remain cryptic due to inter-replicon epistatic interactions. It was also interesting to note that the  
353 strength of the correlation between duplicates (Figure S5), as determined by the size of the  
354 absolute residuals, was higher for the  $\Delta$ pSymAB strain than for the wild type strain in both  
355 media (p-value  $< 2.2 \times 10^{-16}$  for both media, as determined with Welch two-sample t-tests). This  
356 may be reflective of the genetic robustness encoded by the secondary replicons and the stochastic  
357 activation of these processes in the mutant population. Potentially, the high level of inter-  
358 replicon redundancy may reduce the level of purifying selection on the chromosomal copies of  
359 the genes, facilitating more rapid diversification of gene functionality and increased rates of  
360 chromosomal gene evolution. Overall, the results of these analyses suggest that secondary  
361 replicons may influence the evolution of the chromosome and play a vital role in the biology of  
362 the organism, even if these activities remain cryptic due to inter-replicon epistatic interactions.



363 More generally, the Tn-seq data reported here provide a unique perspective of how a  
364 gene's genomic environment influences its genotype-phenotype relationship. Previous studies  
365 have illustrated that the fitness phenotypes of orthologous genes of both distant and closely  
366 related species may differ [21,23-28,47], and even how intercellular effects within microbial  
367 communities can modify the essential genome of a species [48]. The data reported here more  
368 directly addressed the influence of the genomic environment by comparing the fitness  
369 phenotypes of mutating the exact same set of ~ 3,500 genes in two very different genomic  
370 environments. It was found that the non-essential genome had a remarkable influence on what  
371 was classified as a growth-promoting gene, with 10% of *S. meliloti* chromosomal genes  
372 exhibiting fitness-based genetic interactions with the non-essential component of the genome  
373 (Figure 2). This observation was not growth medium-dependent, was not unique to a specific  
374 gene functional class, and was not simply due to an overall reduced fitness of the  $\Delta$ pSymAB  
375 strain as the findings could be largely replicated *in silico* (Figure 4).

376 The majority of the genes whose fitness phenotype was dependent on the genomic  
377 environment became more important for fitness following the genome reduction. In many cases,  
378 this is expected to reflect a loss of functional redundancy; the increased importance of the  
379 chromosomal cytochrome genes likely reflects a compensation for the loss of the pSymA/pSymB  
380 encoded cytochrome complexes (Figure 6). In other cases, it may reflect newly activated  
381 pathways that must compensate for the loss of a normal housekeeping pathway. The specific  
382 essentiality of proline biosynthesis, and the second half of histidine biosynthesis, in the  
383  $\Delta$ pSymAB strain during growth in rich medium presumably reflects the inability of these strains  
384 to transport these compounds and must therefore synthesize them *de novo* (Figure 6). Indeed,  
385 previous metabolomics work is consistent with the  $\Delta$ pSymAB strain being unable to transport

386 many amino acids, including proline and histidine [49]. Similarly, glycolysis appeared  
387 specifically essential in the  $\Delta$ pSymAB strain in rich medium (Figure 6), likely as the reduced  
388 metabolic capacity of this strain [29] led to a greater reliance on catabolism of the abundant  
389 sucrose for energy and biosynthetic precursors. Specific gene essentiality in the  $\Delta$ pSymAB  
390 background may also occur as a result of synthetic negative interactions that are not associated  
391 with metabolic redundancy, for example, synthetic effects of disrupting two independent aspects  
392 of the cell envelope. This may be reflected in the specific essentiality of the *feuNPQ* and *ndvAB*  
393 genes involved in production of periplasmic cyclic  $\beta$ -glucans (Figure 6) [50-53]. The cell  
394 envelope of the  $\Delta$ pSymAB strain is altered compared to the wild-type, due to the loss of  
395 succinoglycan production [54] and the *bacA* gene [55], and the membrane lipid composition  
396 contains signs of increased stress [49]. The fitness of disrupting periplasmic cyclic  $\beta$ -glucans  
397 biosynthesis in this background, further altering the cell envelope, may therefore represent a  
398 synthetic negative interaction.

399         Somewhat surprisingly, approximately a quarter of the genes with a genomic  
400 environment effect had a greater fitness defect in the wild type strain. In some cases this may  
401 have been due to the reduced nutrient demand of the  $\Delta$ pSymAB strain as a result of the smaller  
402 genome content. For example, mutations of genes for arginine biosynthesis and the biosynthesis  
403 of AICAR and UMP, common precursors in the synthesis of purines and pyrimidines,  
404 respectively, had fitness defects in rich medium specifically in the wild-type (Figure 6). This  
405 may reflect that in this environment, the uptake of these nutrients is growth limiting to the wild-  
406 type in the absence of their *de novo* synthesis, whereas this is not the case in the  $\Delta$ pSymAB  
407 strain due to the reduced genome size, and thus lower nutrient requirement, and the already  
408 reduced growth rate (Figure S8). Another possibility is that removal of pSymAB evokes

409 phenotypes that are epistatic to many of those brought about by chromosomal mutations. For  
410 example, the removal of pSymB is expected to have resulted in alterations of the cell membrane  
411 [49,54,55]; our observation that many mutations causing greater relative fitness defects in wild-  
412 type cells are associated with lipid metabolism, such as biosynthesis of the lipopolysaccharide  
413 core oligosaccharide (Figure 6) may be a result of those mutations being phenotypically masked  
414 in the absence of pSymB.

415 Our work in integrating the Tn-seq data with *in silico* metabolic modelling made it  
416 evident that Tn-seq alone is insufficient to identify the entire core metabolism of an organism;  
417 almost a third of the reactions present in the core metabolic reconstruction were not supported by  
418 Tn-seq data (Figure 5 and Table 3). Similarly, the large number of changes made in the gene-  
419 reaction relationships when producing the core model illustrated the limitations in the quality of  
420 metabolic reconstructions when high-throughput mutagenesis data are lacking. In some cases,  
421 the gaps in the Tn-seq data were due to genomic environment effects, such as genetic  
422 redundancy, in other cases it was due to the inclusion of reactions that are non-essential but that  
423 are nonetheless required for production of ‘wild type’ cells, and sometimes the gene associated  
424 with a reaction is simply unknown. A fourth possibility is phenotypic complementation through  
425 cross-feeding. Given that Tn-seq involves growth of a population of mutants, a mutant unable to  
426 produce an essential metabolite may still grow if the metabolite is excreted and transferred to the  
427 mutant from the rest of the population.

428 Regardless of the reasons why Tn-seq may have missed so many central metabolic  
429 reactions, this limitation can have a significant practical impact in the modern era of synthetic  
430 biology. The results of Tn-seq studies may be used to guide engineering of designer microbial  
431 factories with specific properties [56], or for the identification of putative new therapeutic targets

432 [25,57]. While Tn-seq studies undoubtedly give invaluable information to be used towards these  
433 goals, basing engineered cells solely on Tn-seq studies is insufficient, as evidenced in the recent  
434 monumental efforts to design and synthesize a minimal bacterial genome [22] . Importantly, this  
435 limitation can be overcome by combining Tn-seq with metabolic modelling. We are aware of  
436 only a few other studies making use of both Tn-seq data and metabolic reconstruction [58-62];  
437 however, these studies almost always focus on using the Tn-seq data to refine the metabolic  
438 reconstruction. As illustrated here, combining an experimental Tn-seq approach with a ground-  
439 up *in silico* metabolic reconstruction strategy can improve not only the reconstruction but also  
440 overcome the limitations of the Tn-seq approach. A Tn-seq-guided reconstruction process forces  
441 the identification of missing essential reactions, while ensuring correct gene-reaction  
442 associations, and the integrated approach can facilitate functional annotation of genes without  
443 clear biological roles. This process allows one to obtain a very high-quality representation of the  
444 metabolism, and the underlying genetics, of the organism in the given environment. The  
445 resulting model can serve as a blueprint to simply understand the workings of the cell, or as a  
446 basis for developing new cell factories.

447

## 448 MATERIALS AND METHODS

### 449 **Bacterial strains, media, and growth conditions.**

450 The wild type and  $\Delta$ pSymAB strains used throughout this work are the RmP3499 and  
451 RmP3496 strains, respectively, whose construction was described previously [30]. All *E. coli* or  
452 *S. meliloti* strains used in this study are described in Table S5 and were grown at 37°C or 30°C,  
453 respectively. BRM medium was used as the rich medium for growth of the *S. meliloti* strains,  
454 and it consisted of 5 g/L Bacto Tryptone, 5 g/L Bacto Yeast Extract, 50 mM NaCl, 2 mM

455 MgSO<sub>4</sub>, 2 μM CoCl<sub>2</sub>, 0.5% (w/v) sucrose, and supplemented with the following antibiotics, as  
456 appropriate: streptomycin (Sm, 200 μg/ml), neomycin (Nm, 100 μg/ml), gentamycin (Gm, 15  
457 μg/ml). The defined medium for growth of *S. meliloti* contained 50 mM NaCl, 10 mM KH<sub>2</sub>PO<sub>4</sub>,  
458 10 mM NH<sub>4</sub>Cl, 2 mM MgSO<sub>4</sub>, 0.2 mM CaCl<sub>2</sub>, 0.5% (w/v) sucrose, 2.5 μM thiamine, 2 μM  
459 biotin, 10 μM EDTA, 10 μM FeSO<sub>4</sub>, 3 μM MnSO<sub>4</sub>, 2 μM ZnSO<sub>4</sub>, 2 μM H<sub>3</sub>BO<sub>3</sub>, 1 μM CoCl<sub>2</sub>,  
460 0.2 μM Na<sub>2</sub>MoO<sub>4</sub>, 0.3 μM CuSO<sub>4</sub>, 50 μg/ml streptomycin, and 30 μg/ml neomycin. *E. coli*  
461 strains were grown on Luria-Bertani (LB) supplemented with the following antibiotics as  
462 appropriate: chloramphenicol (30 mg/ml), kanamycin (Km, 30 μg/ml), gentamycin (Gm, 3  
463 μg/ml).

#### 464 **Growth curves.**

465 Overnight cultures grown in rich media with the appropriate antibiotics were pelleted,  
466 washed with a phosphate buffer (20 mM KH<sub>2</sub>PO<sub>4</sub> and 100 mM NaCl), and resuspended to an  
467 OD<sub>600</sub> of 0.25. Twelve μl of each cell suspension was mixed with 288 μl of growth medium,  
468 without antibiotics, in wells of a 100-well Honeycomb microplate. Plates were incubated in a  
469 Bioscreen C analyzer at 30°C with shaking, and OD<sub>600</sub> recorded every hour for at least 48 hours.

#### 470 ***S. meliloti* mutant construction for Tn-seq validation.**

471 Single gene knockout mutants were generated through single cross-over plasmid  
472 integration of the suicide plasmid pJG194 [63]. Approximately 400-bp fragments homologous to  
473 the central portion of the target genes were PCR amplified using the primers listed in Table S6.  
474 PCR products as well as the pJG194 and pJG796 vectors were digested with the restriction  
475 enzymes *EcoRI/HindIII*, *BamHI/XbaI*, or *SalI/XhoI*, and each PCR fragment was ligated into the  
476 appropriately digested pJG194 or pJG796 vector using standard molecular biology techniques  
477 [64], and all recombinant plasmids verified. Recombinant plasmids were mobilized from *E. coli*

478 to *S. meliloti* via tri-parental matings as described before [52], and transconjugants isolated on  
479 BRM Sm Nm agar plates. All *S. meliloti* mutants were verified by PCR.

480 Transduction of the integrated plasmids into the *S. meliloti* wild type and  $\Delta$ pSymAB  
481 strains was performed using phage N3 as described elsewhere [65], with transductants recovered  
482 on BRM medium containing the appropriate antibiotics.

### 483 **Construction of the transposon delivery vector pJG714**

484 The plasmid pJG714 is a variant of the previously reported mini-Tn5 delivery plasmid,  
485 pJG110 [63], with the primary modifications being removal of the *bla* gene and pUC origin of  
486 replication, and introduction of the *pir*-dependent R6K replication origin. A map of pJG714 is  
487 given in Figure S1A, and the complete sequence of the transposable region is provided in Figure  
488 S1B. This delivery plasmid is maintained in *E. coli* strain MFD*pir* [66], which possesses  
489 chromosomal copies of R6K *pir* and RK2 transfer functions. MFD*pir* is unable to synthesize  
490 diaminopimelic acid (DAP), thus disabling growth on rich or defined medium lacking  
491 supplemental DAP. The MFD*pir*/pJG714 strain is cultured on rich medium containing  
492 kanamycin and 12.5  $\mu$ g/ml DAP.

### 493 **Tn-seq experimental setup.**

494 Transposon mutagenesis was accomplished in the wild-type and  $\Delta$ pSymAB strains in  
495 parallel. Flask cultures of MFD*pir*/pJG714 and the two *S. meliloti* strains were grown overnight  
496 to saturation, and pellets were washed and suspended in BRM to a final OD<sub>600</sub> value of  
497 approximately 40. Equal volumes of each suspension were mixed as bi-parental matings, to  
498 accomplish mobilization of the transposon delivery vector into the *S. meliloti* recipient strains.  
499 These cell mixtures were plated on BRM supplemented with 50  $\mu$ g/ml DAP and incubated at  
500 30°C for 6 h. Mating mixtures were collected in BRM with 10% glycerol, and cell clumps were

501 broken up by shaking the suspended material for 30 min at 225 rpm. Aliquots were stored at -  
502 80°C. For selection of transposants, mating mixes were thawed and plated at a density of 15,000  
503 cfu/plate (150-mm plates) on BRM supplemented with Sm and Nm. To accomplish equivalent  
504 coverage of each genome with transposon insertions, 675,000 and 360,000 colonies were  
505 selected for the wild-type and  $\Delta$ pSymAB strains, respectively. For each recipient, transposon  
506 mutant colonies were collected and cell clumps were broken up as described above. The selected  
507 clone libraries were aliquoted and stored at -80°C.

508 For whole-population selection and massively parallel sequencing of transposon ends,  
509  $1 \times 10^9$  cells from each of the two clone libraries were transferred into 500 ml of either BRM or  
510 defined medium, allowing approximately 8-10 generations of growth at 30°C before reaching  
511 saturation. At this stage, cells were pelleted, DNA was extracted using the MoBio microbial  
512 DNA isolation kit (#12255-50), and the resulting DNA was fragmented with NEB fragmentase  
513 (#M0348S) to an average molecular weight of 1000 bp. After clean-up (Qiagen #27106), the  
514 resulting DNA fragments were appended with short 3' homopolymer (oligo-dCTP) tails using  
515 terminal deoxynucleotidyl transferase (NEB #M0315S), and this sample was used as the  
516 template for a two-round PCR that gave rise to the final Illumina-ready libraries. In the first  
517 round, a transposon end-specific primer (1TN) and oligo-G primer (1GG) were used (all primer  
518 sequences can be found in Table S6). After clean-up, a portion of the first-round product was  
519 used as the template for the second-round reaction employing a nested transposon-specific  
520 primer (2TNA-C) and a reverse index-incorporating primer (2BAR01-08). The series of three  
521 2TN primers (A-C) were designed to incorporate base diversity in the opening cycles of Illumina  
522 sequencing, and the series of eight 2BAR primers were designed to uniquely identify each  
523 experimental condition in a single multiplexed sequencing sample. After PCR amplification of

524 transposon-flanking sequences with concomitant incorporation of Illumina adapters and  
525 barcodes, the samples were size-selected for 200-600-bp fragments, and sequenced on an  
526 Illumina Hi-Seq instrument as 50-bp single-end reads. Raw reads were used as input into a  
527 custom-built Tn-seq analytical pipeline, which was recently described [57].

#### 528 **Calculation of gene and synthetic indexes.**

529 For calculation of Gene Essentiality Index (GEI) scores, a pseudo count of one was first  
530 added to all gene read counts for each replicate. GEI were then calculated by summing the  
531 number of reads that mapped to the gene in both replicates, and dividing this number by the  
532 nucleotide length of the gene. GEI scores were calculated for each gene separately in each  
533 medium and in each strain. All GEI values are available in Data Set S1.

534 Synthetic Media Index (SMI) scores were calculated to represent the difference in GEI  
535 scores between the two media for the same strain. Raw SMI scores were determined by dividing  
536 the GEI of the gene in defined medium by the GEI of the gene in rich medium. Processed SMI  
537 scores, those shown throughout the manuscript, were determined as follows. If the raw value was  
538 above one, the processed SMI and the raw SMI are the same. Raw SMI scores that were below  
539 one were converted to processed SMI scores through the transformation, “1 / raw SMI score”,  
540 and presenting the value as a negative number.

541 Raw and processed Synthetic Rich Index (SRI) and Synthetic Defined Index (SDI) scores  
542 were calculated to represent the difference in the GEI scores of a gene between the wild-type and  
543  $\Delta$ pSymAB strains when grown in rich or defined medium, respectively. SRI and SDI indexes  
544 were calculated using the same procedure as described for the SMI scores above. All synthetic  
545 index scores are provided in Data Set S1.

546



## 547 **Statistical analysis of the Tn-seq output.**

548           The output of the Tn-seq analysis pipeline was used in the fitness classification of genes  
549 as follows. First, all genes with no observed insertions were classified as essential. Next, GEI  
550 scores were imported into R version 3.2.3 and log transformed. Initial clustering of the log  
551 transformed GEI scores into fitness categories was performed using the *Mclust* function of the  
552 *Mclust* package in R [67]. In short, this function attempts to explain the distribution of GEI  
553 values by fitting a series of overlapping Gaussian distributions, with the number and shape of the  
554 distributions determined by *Mclust*. The data are then assigned to different categories based on  
555 the probability of the data point arising from each of the distributions. As high uncertainty in the  
556 classification of genes at the borders of groupings exists, the clusters were refined through the  
557 use of affinity propagation implemented by the *apcluster* function of the *apcluster* package of R  
558 [68]. All genes belonging to an *apcluster* grouping that contained an essential gene, as  
559 determined in any of the previous steps, were re-annotated as essential. Additionally, all genes  
560 belonging to an *apcluster* grouping that spanned the border of two *Mclust* groups were transferred  
561 to the same classification, based on which cluster the genes had a higher median probability of  
562 being derived from in the *Mclust* analysis. Finally, genes that were classified as ‘essential’ in one  
563 medium and ‘large growth impairment’ in the second medium, but that were identified as having  
564 no medium specificity based on their SMI scores, were considered as essential in both media.

565           Genes with GEI scores significantly different between conditions were determined as  
566 follows. The synthetic indexes (SMI, SDI, SRI) scores were imported into R and log  
567 transformed, and the following clustering performed independently for each index. The log  
568 transformed synthetic scores were clustered using *Mclust* and *apcluster* in R as described above  
569 for the GEI scores. In the case of the SMI scores, three clusters were produced ‘Little to no

570 difference', 'Moderate difference', and 'Large difference'; only genes with a SMI scores  
571 classified as 'Large difference' were considered to display a medium specificity. In the case of  
572 SDI and SRI scores, only two clusters were produced: 'Little to no difference' and 'Difference  
573 between strains'.

#### 574 **Gene functional enrichments.**

575 Assignment of chromosomal genes into specific functional categories was performed  
576 largely based on the annotations provided on the *S. meliloti* Rm1021 online genome database  
577 (<https://iant.toulouse.inra.fr/bacteria/annotation/cgi/rhime.cgi>). This website pulls annotations  
578 from several databases including PubMed, Swissprot, trEMBL, and Interpro. Additionally, it  
579 provides enzyme codes, PubMed IDs, functional classifications, and suggested Gene Ontology  
580 (GO) terms for most genes. The numerous classifications were simplified to 18 functional  
581 categories, designed to adequately cover all core cellular processes. Occasionally, ambiguous or  
582 conflicting annotations were observed. In these cases, protein BLASTp searches through the  
583 NCBI server were performed against the non-redundant protein database. If putative domains  
584 were detected within the amino acid sequence, a combination of the best hit (lowest E-value) and  
585 consensus among domain annotations were used to categorize the gene in question. If no putative  
586 domains were detected, the functional annotation was based on the best scoring protein hits in  
587 the database. The functional annotations of all chromosomal genes are provided in Data Set S5.

#### 588 **Data visualization.**

589 Tn-seq results were visualized using the Integrative Genomics Viewer v2.3.97 [69].  
590 Scatter plots, functional enrichment plots, box plots, and line plots were generated in R using the  
591 *ggplot2* package [70]. Venn diagrams were produced in R using the *VennDiagram* package [71].  
592 The genome map was prepared using the *circos* v0.67-7 software [72]; the sliding window

593 insertion density was calculated with the *geom\_histogram* function of *ggplot2*, and the GC skew  
594 was calculated using the analysis of sequence heterogeneity sliding window plots online  
595 webserver [73]. The metabolic model was visualized using the iPath v2.0 webserver [74]. The  
596 logo of the transposon insertion site specificity was generated by first extracting the nucleotides  
597 surrounding all unique insertion sites in one replicate of the wild-type grown in rich medium  
598 using Perl v5.18.2, followed by generation of a hidden Markov model with the *hmmbuild*  
599 function of HMMER v3.1b2 [75] and visualization with the Skyline webserver [76].

#### 600 **Blast Bidirectional Best Hit (Blast-BBH) strategy.**

601 Putative orthologous proteins between species were identified with a Blast-BBH  
602 approach, implemented using a modified version of our in-house Shell and Perl pipeline [77].  
603 This pipeline involved GNU bash v4.3.48(1), Perl v5.22.1, Python v2.7.12 and the Blast v2.6.0+  
604 software [78]. Proteomes were downloaded from the National Center for Biotechnology  
605 Information repository, and the Genbank annotations were used. As a threshold to limit false  
606 positives, Blast-BBH pairs were only maintained if they displayed a minimum of 30% amino  
607 acid identity over at least 60% of the protein. To identify putative duplicate proteins in *S.*  
608 *meliloti*, the same Blast-BBH approach was employed to compare the *S. meliloti* chromosomal  
609 proteome with the proteins encoded by pSymA and pSymB.

#### 610 ***In silico* metabolic modeling procedures.**

611 All simulations were performed in Matlab 2017a (Mathworks) with scripts from the  
612 Cobra Toolbox (downloaded May 12, 2017 from the openCOBRA repository) [79], and using  
613 the Gurobi 7.0.2 solver ([www.gurobi.com](http://www.gurobi.com)), the SBMLToolbox 4.1.0 [80], and libSBML 5.15.0  
614 [81]. Boundary conditions for simulation of the defined medium are given in Table S7. *In silico*  
615 analysis of redundancy in the *S. meliloti* genome was performed using the iGD1575b metabolic

616 reconstruction, whose development is described in the following section. Single and double gene  
617 deletion analyses were performed using the *singleGeneDeletion* and *doubleGeneDeletion*  
618 functions, respectively, using the Minimization of Metabolic Adjustment (MOMA) method. All  
619 Matlab scripts used in this work are provided as File S3.

620 For all deletion mutants, the growth rate ratio (grRatio) was calculated (growth rate of  
621 mutant / growth rate of wild type). Single gene deletion mutants were considered to have a  
622 growth defect if the grRatio was  $< 0.9$ . For the double gene deletion analysis, if the grRatio of  
623 the double mutant was less than 0.9 the expected grRatio (based on multiplying the grRatio of  
624 the two corresponding single mutants), the double deletion was said to have a synthetic negative  
625 phenotype.

#### 626 **Development of iGD1575b.**

627 For *in silico* analysis of redundancy in the *S. meliloti* genome, the previously published *S.*  
628 *meliloti* genome-scale metabolic model iGD1575 [34] was modified slightly. As indicated in  
629 Table S8, the biomass composition was updated to include 31 additional compounds at trace  
630 concentrations, including vitamins, coenzymes, and ions, in order to ensure the corresponding  
631 transport or biosynthetic pathways were essential. However, the original model iGD1575 was  
632 unable to produce vitamin B12 and holo-carboxylate. To rectify this, the reversibility of  
633 rxn00792\_c0 was changed from ‘false’ to ‘true’, and the reactions rxn01609, rxn06864, and  
634 rxnBluB were added to the model. However, no new genes were included in the model. This  
635 updated model was termed iGD1575b and is available in SBML and Matlab format in File S2.

#### 636 **Simulating the removal of pSymA and pSymB *in silico*.**

637 Several modifications to iGD1575b were required in order to produce a viable model  
638 following the deletion of all pSymA and pSymB genes. As described previously [34],

639 succinoglycan was removed from the biomass composition, ‘gapfill’ GPRs (gene-protein-  
640 reaction relationships) were added to the reactions ‘rxn01675\_c0’, ‘rxn01997\_c0’,  
641 ‘rxn02000\_c0’, and ‘rxn02003\_c0’ in order to allow the continued production of the full LPS  
642 molecule, as well as to ‘rxn00416\_c0’ to allow asparagine biosynthesis. Additionally, ‘gapfill’  
643 GPRs were added to the reactions ‘rxn03975\_c0’ and ‘rxn03393\_c0’ so that removal of pSymA  
644 and pSymB did not prevent biosynthesis of vitamin B12 and ubiquinone-8, respectively. Finally,  
645 a glycerol export reaction via diffusion (rxnBLTPcpd00100b) was added to remove the glycerol  
646 build-up resulting from cardiolipin biosynthesis. The modified version of the model was termed  
647 iGD1575c, and is available in in SBML and Matlab format in File S2. For simulating the  
648 removal of pSymA and pSymB in Matlab, all pSymA and pSymB genes were deleted from the  
649 iGD1575b model using the *deleteModelGenes* function, followed by the removal of all  
650 constrained reactions using the *removeRxns* function.

### 651 **Building the draft *R. leguminosarum* metabolic model.**

652 A draft, fully automated model containing no manual curation for *R. leguminosarum* bv.  
653 *viciae* 3841 was built using the KBase webserver ([www.kbase.us](http://www.kbase.us)). The Genbank file  
654 (GCA\_000009265.1\_ASM926v1\_genomic.gbff) of the *R. leguminosarum* genome [82] was  
655 uploaded to KBase and re-annotated using the ‘annotate microbial genome’ function,  
656 maintaining the original locus tags. An automated metabolic model was then built using the  
657 ‘build metabolic model’ function, with gap-filling. This model included 1537 genes, 1647  
658 reaction, and 1731 metabolites, and is available in in SBML and Matlab format in File S2. The  
659 biomass composition was not modified from the default Gram negative biomass of Kbase. All  
660 essential model genes were determined using the Cobra Toolbox in Matlab with the

661 *singleGeneDeletion* function and the MOMA protocol, with exchange reaction bounds set as  
662 provided in Table S7.

### 663 **Building the *S. meliloti* core metabolic reconstruction, iGD726.**

664 The iGD726 model was built from the ground-up using the existing iGD1575 model as a  
665 reaction and GPR database, and with the Tn-seq data as a guide. Each metabolic pathway  
666 included in iGD726 was rebuilt in a new file by adding individual reactions to the file. These  
667 reactions were taken from iGD1575, or were taken from other sources, primarily the Kyoto  
668 Encyclopedia of Genes and Genomes (KEGG) database [83], if an appropriate reaction was  
669 missing in iGD1575. Following the transfer of each reaction, the genes associated with the  
670 reaction were checked against the Tn-seq data, and a literature search for each associated gene  
671 was performed. The gene associations were then modified as necessary to ensure the model  
672 accurately captured the experimental data. For example, if gene was experimentally determined  
673 to be essential, but the corresponding reaction for the gene was associated with multiple  
674 alternative genes, all but the essential gene were removed from the reaction. Similarly, if a non-  
675 essential gene was associated with an essential reaction, a second gene or an Unknown was  
676 added to reflect the apparent redundancy in the genome. Where possible, unknowns in the gene  
677 associations were replaced with genes whose gene product may catalyze the reaction.

678 During the construction of the core model, the biomass composition was updated. This  
679 included modifying the membrane lipid composition to include lipids with different sized fatty  
680 acids based on the ratio experimentally determined [84]; the original iGD1575 model contained  
681 only one representative per each membrane lipid class. Additionally, essential vitamins,  
682 cofactors, and ions were added to the biomass composition at trace concentrations to ensure that

683 their biosynthesis or transport was essential. The complete biomass composition is provided in  
684 Table S3.

685 The necessary metabolic and transport reactions to allow the model to growth with  
686 sucrose, glucose, or succinate were included in the reconstruction. Once the model was capable  
687 of producing all biomass components using any of the three carbon sources, the list of model  
688 genes was compared with the list of 489 core growth promoting genes to identify genes not  
689 included in the model but experimentally determined to contribute to growth. When possible,  
690 missing genes and their corresponding reactions were added to the core model. The final model  
691 contained 726 genes, 681 reactions, and 703 metabolites, and is provided in SBML and Matlab  
692 format in File S2, and as an Excel file in Data Set S4. The Excel file contains all necessary  
693 information for use as a *S. meliloti* metabolic resource, including the reaction name, the reaction  
694 equation using the real metabolite names, the associated genes/proteins, and references.  
695 Additionally, for each reaction, the putative orthologs of the associated genes in 10 related  
696 Rhizobiales species are included, allowing the model to provide useful information for each of  
697 these organisms.

698

### 699 **FUNDING INFORMATION**

700 This work was funded by National Science Foundation grant IOS-1054980 to Joel S  
701 Griffiths. George C diCenzo was supported by the Natural Sciences and Engineering Research  
702 Council of Canada (NSERC) through a PDF fellowship. Work in the laboratory of Turlough M  
703 Finan was funded by NSERC. The funders had no role in the study design, data collection and  
704 interpretation, or the decision to submit the work for publication.

705

706

## REFERENCES

- 707 1. Orgogozo V, Morizot B, Martin A. The differential view of genotype-phenotype  
708 relationships. *Front Genet.* 2015;6: 179. doi:10.3389/fgene.2015.00179
- 709 2. Ritchie MD, Holzinger ER, Li R, Pendergrass SA, Kim D. Methods of integrating data to  
710 uncover genotype-phenotype interactions. *Nat Rev Genet.* 2015;16: 85–97.  
711 doi:10.1038/nrg3868
- 712 3. Palsson B. Metabolic systems biology. *FEBS Lett.* 2009;583: 3900–3904.  
713 doi:10.1016/j.febslet.2009.09.031
- 714 4. Durot M, Bourguignon P-Y, Schachter V. Genome-scale models of bacterial metabolism:  
715 reconstruction and applications. *FEMS Microbiol Rev.* 2009;33: 164–190.  
716 doi:10.1111/j.1574-6976.2008.00146.x
- 717 5. O’Brien EJ, Monk JM, Palsson BØ. Using genome-scale models to predict biological  
718 capabilities. *Cell.* 2015;161: 971–987.
- 719 6. van Opijnen T, Bodi KL, Camilli A. Tn-seq: high-throughput parallel sequencing for  
720 fitness and genetic interaction studies in microorganisms. *Nat Methods.* 2009;6: 767–772.  
721 doi:10.1038/nmeth.1377
- 722 7. van Opijnen T, Camilli A. Transposon insertion sequencing: a new tool for systems-level  
723 analysis of microorganisms. *Nature Rev Microbiol.* 2013;11: 435–442.  
724 doi:10.1038/nrmicro3033
- 725 8. Thiele I, Palsson BØ. A protocol for generating a high-quality genome-scale metabolic  
726 reconstruction. *Nat Protoc.* 2010;5: 93–121. doi:10.1038/nprot.2009.203
- 727 9. Orth JD, Thiele I, Palsson BØ. What is flux balance analysis? *Nat Biotechnol.* 2010;28:  
728 245–248. doi:10.1038/nbt.1614



- 729 10. Fowler ZL, Gikandi WW, Koffas MAG. Increased malonyl coenzyme A biosynthesis by  
730 tuning the *Escherichia coli* metabolic network and its application to flavanone production.  
731 Appl Environ Microbiol. 2009;75: 5831–5839. doi:10.1128/AEM.00270-09
- 732 11. Pratapa A, Balachandran S, Raman K. Fast-SL: an efficient algorithm to identify synthetic  
733 lethal sets in metabolic networks. Bioinformatics. 2015;31: 3299–3305.  
734 doi:10.1093/bioinformatics/btv352
- 735 12. Chao MC, Abel S, Davis BM, Waldor MK. The design and analysis of transposon  
736 insertion sequencing experiments. Nature Rev Microbiol. 2016;14: 119–128.  
737 doi:10.1038/nrmicro.2015.7
- 738 13. Thomaidis HB, Davison EJ, Burston L, Johnson H, Brown DR, Hunt AC, et al. Essential  
739 bacterial functions encoded by gene pairs. J Bacteriol. 2007;189: 591–602.  
740 doi:10.1128/JB.01381-06
- 741 14. diCenzo GC, Finan TM. Genetic redundancy is prevalent within the 6.7 Mb *Sinorhizobium*  
742 *meliloti* genome. Mol Genet Genomics. 2015;290: 1345–1356. doi:10.1007/s00438-015-  
743 0998-6
- 744 15. Bergmiller T, Ackermann M, Silander OK. Patterns of evolutionary conservation of  
745 essential genes correlate with their compensability. PLOS Genet. 2012;8: e1002803.  
746 doi:10.1371/journal.pgen.1002803
- 747 16. Liu G, Yong MYJ, Yurieva M, Srinivasan KG, Liu J, Lim JSY, et al. Gene essentiality is a  
748 quantitative property linked to cellular evolvability. Cell. 2015;163: 1388–1399.
- 749 17. Butland G, Babu M, Díaz-Mejía JJ, Bohdana F, Phanse S, Gold B, et al. eSGA: *E. coli*  
750 synthetic genetic array analysis. Nat Methods. 2008;5: 789–795. doi:10.1038/nmeth.1239
- 751 18. Costanzo M, Baryshnikova A, Bellay J, Kim Y, Spear ED, Sevier CS, et al. The genetic

- 752 landscape of a cell. *Science*. 2010;327: 425–431. doi:10.1126/science.1180823
- 753 19. Phillips PC. Epistasis—the essential role of gene interactions in the structure and evolution  
754 of genetic systems. *Nat Rev Genet*. 2008;9: 855–867. doi:10.1038/nrg2452
- 755 20. Juhas M. On the road to synthetic life: the minimal cell and genome-scale engineering. *Crit*  
756 *Rev Biotechnol*. 2016;36: 416–423. doi:10.3109/07388551.2014.989423
- 757 21. Juhas M, Reuß DR, Zhu B, Commichau FM. *Bacillus subtilis* and *Escherichia coli*  
758 essential genes and minimal cell factories after one decade of genome engineering.  
759 *Microbiology*. 2014;160: 2341–2351. doi:10.1099/mic.0.079376-0
- 760 22. Hutchison CA, Chuang R-Y, Noskov VN, Assad-Garcia N, Deerinck TJ, Ellisman MH, et  
761 al. Design and synthesis of a minimal bacterial genome. *Science*. 2016;351: aad6253–  
762 aad6253. doi:10.1126/science.aad6253
- 763 23. Curtis PD, Brun YV. Identification of essential alphaproteobacterial genes reveals  
764 operational variability in conserved developmental and cell cycle systems. *Mol Microbiol*.  
765 2014;93: 713–735. doi:10.1111/mmi.12686
- 766 24. Pechter KB, Gallagher L, Pyles H, Manoil CS, Harwood CS. Essential genome of the  
767 metabolically versatile alphaproteobacterium *Rhodospseudomonas palustris*. *J Bacteriol*.  
768 2016;198: 867–876. doi:10.1128/JB.00771-15
- 769 25. Lee SA, Gallagher LA, Thongdee M, Staudinger BJ, Lippman S, Singh PK, et al. General  
770 and condition-specific essential functions of *Pseudomonas aeruginosa*. *Proc Natl Acad Sci*  
771 *USA*. 2015;112: 5189–5194. doi:10.1073/pnas.1422186112
- 772 26. Skurnik D, Roux D, Aschard H, Cattoir V, Yoder-Himes D, Lory S, et al. A  
773 comprehensive analysis of *in vitro* and *in vivo* genetic fitness of *Pseudomonas aeruginosa*  
774 using high-throughput sequencing of transposon libraries. *PLOS Pathog*. 2013;9:

- 775 e1003582. doi:10.1371/journal.ppat.1003582
- 776 27. Freed NE, Bumann D, Silander OK. Combining *Shigella* Tn-seq data with gold-standard *E.*  
777 *coli* gene deletion data suggests rare transitions between essential and non-essential gene  
778 functionality. BMC Microbiol. 2016;16: 203. doi:10.1186/s12866-016-0818-0
- 779 28. Canals R, Xia X-Q, Fronick C, Clifton SW, Ahmer BM, Andrews-Polymenis HL, et al.  
780 High-throughput comparison of gene fitness among related bacteria. BMC Genomics.  
781 2012;13: 212. doi:10.1186/1471-2164-13-212
- 782 29. diCenzo GC, MacLean AM, Milunovic B, Golding GB, Finan TM. Examination of  
783 prokaryotic multipartite genome evolution through experimental genome reduction. PLOS  
784 Genet. 2014;10: e1004742. doi:10.1371/journal.pgen.1004742
- 785 30. diCenzo GC, Zamani M, Milunovic B, Finan TM. Genomic resources for identification of  
786 the minimal N<sub>2</sub>-fixing symbiotic genome. Environ Microbiol. 2016;18: 2534–2547.  
787 doi:10.1111/1462-2920.13221
- 788 31. Perry BJ, Yost CK. Construction of a *mariner*-based transposon vector for use in insertion  
789 sequence mutagenesis in selected members of the *Rhizobiaceae*. BMC Microbiol. 2014;14:  
790 298. doi:10.1186/s12866-014-0298-z
- 791 32. Perry BJ, Akter MS, Yost CK. The use of transposon insertion sequencing to interrogate  
792 the core functional genome of the legume symbiont *Rhizobium leguminosarum*. Front  
793 Microbiol. 2016;7: 1873. doi:10.3389/fmicb.2016.01873
- 794 33. Wheatley RM, Ramachandran VK, Geddes BA, Perry BJ, Yost CK, Poole PS. The role of  
795 O<sub>2</sub> in the growth of *Rhizobium leguminosarum* bv. *viciae* 3841 on glucose and succinate. J  
796 Bacteriol. 2016;199: e00572–16. doi:10.1128/JB.00572-16
- 797 34. diCenzo GC, Checcucci A, Bazzicalupo M, Mengoni A, Viti C, Dziewit L, et al. Metabolic

- 798 modelling reveals the specialization of secondary replicons for niche adaptation in  
799 *Sinorhizobium meliloti*. Nat Commun. 2016;7: 12219. doi:10.1038/ncomms12219
- 800 35. Schurr MJ, Vickrey JF, Kumar AP, Campbell AL, Cunin R, Benjamin RC, et al. Aspartate  
801 transcarbamoylase genes of *Pseudomonas putida*: requirement for an inactive  
802 dihydroorotase for assembly into the dodecameric holoenzyme. J Bacteriol. 1995;177:  
803 1751–1759.
- 804 36. Labedan B, Xu Y, Naumoff DG, Glansdorff N. Using quaternary structures to assess the  
805 evolutionary history of proteins: the case of the aspartate carbamoyltransferase. Mol Biol  
806 Evol. 2004;21: 364–373. doi:10.1093/molbev/msh024
- 807 37. Dunn MF. Key roles of microsymbiont amino acid metabolism in rhizobia-legume  
808 interactions. Critical Reviews in Microbiology. 2015;41: 411–451.  
809 doi:10.3109/1040841X.2013.856854
- 810 38. De Bruijn FJ, Lupski JR. The use of transposon Tn5 mutagenesis in the rapid generation of  
811 correlated physical and genetic maps of DNA segments cloned into multicopy plasmids--a  
812 review. Gene. 1984;27: 131–149.
- 813 39. Berg DE, Schmandt MA, Lowe JB. Specificity of transposon Tn5 insertion. Genetics.  
814 1983;105: 813–828.
- 815 40. Goryshin IY, Miller JA, Kil YV, Lanzov VA, Reznikoff WS. Tn5/IS50 target recognition.  
816 Proc Natl Acad Sci USA. 1998;95: 10716–10721.
- 817 41. Green B, Bouchier C, Fairhead C, Craig NL, Cormack BP. Insertion site preference of Mu,  
818 Tn5, and Tn7 transposons. Mob DNA. 2012;3: 3. doi:10.1186/1759-8753-3-3
- 819 42. Harrison PW, Lower RPJ, Kim NKD, Young JPW. Introducing the bacterial “chromid”:  
820 not a chromosome, not a plasmid. Trends Microbiol. 2010;18: 141–148.

- 821        doi:10.1016/j.tim.2009.12.010
- 822    43.    diCenzo GC, Finan TM. The divided bacterial genome: structure, function, and evolution.  
823        *Microbiol Mol Biol Rev.* 2017;81: e00019–17. doi:10.1128/MMBR.00019-17
- 824    44.    Galardini M, Brillì M, Spini G, Rossi M, Roncaglia B, Bani A, et al. Evolution of intra-  
825        specific regulatory networks in a multipartite bacterial genome. *PLOS Comput Biol.*  
826        2015;11: e1004478. doi:10.1371/journal.pcbi.1004478
- 827    45.    diCenzo G, Milunovic B, Cheng J, Finan TM. The tRNA<sup>arg</sup> gene and *engA* are essential  
828        genes on the 1.7-mb pSymB megaplasmid of *Sinorhizobium meliloti* and were translocated  
829        together from the chromosome in an ancestral strain. *J Bacteriol.* 2013;195: 202–212.  
830        doi:10.1128/JB.01758-12
- 831    46.    Oresnik IJ, Liu SL, Yost CK, Hynes MF. Megaplasmid pRme2011a of *Sinorhizobium*  
832        *meliloti* is not required for viability. *J Bacteriol.* 2000;182: 3582–3586.
- 833    47.    Koo B-M, Kritikos G, Farelli JD, Todor H, Tong K, Kimsey H, et al. Construction and  
834        analysis of two genome-scale deletion libraries for *Bacillus subtilis*. *Cell Systems.* 2017;4:  
835        291–305.e7.
- 836    48.    Armbruster CE, Forsyth-DeOrnellas V, Johnson AO, Smith SN, Zhao L, Wu W, et al.  
837        Genome-wide transposon mutagenesis of *Proteus mirabilis*: Essential genes, fitness factors  
838        for catheter-associated urinary tract infection, and the impact of polymicrobial infection on  
839        fitness requirements. *PLOS Pathog.* 2017;13: e1006434. doi:10.1371/journal.ppat.1006434
- 840    49.    Fei F, diCenzo GC, Bowdish DME, McCarry BE, Finan TM. Effects of synthetic large-  
841        scale genome reduction on metabolism and metabolic preferences in a nutritionally  
842        complex environment. *Metabolomics.* 2016;12: 23. doi:10.1007/s11306-015-0928-y
- 843    50.    Stanfield SW, Ielpi L, O'brochta D, Helinski DR, Ditta GS. The *ndvA* gene product of

- 844 *Rhizobium meliloti* is required for beta-(1----2)glucan production and has homology to the  
845 ATP-binding export protein HlyB. J Bacteriol. 1988;170: 3523–3530.  
846 doi:10.1128/jb.170.8.3523-3530.1988
- 847 51. Ielpi L, Dylan T, Ditta GS, Helinski DR, Stanfield SW. The *ndvB* locus of *Rhizobium*  
848 *meliloti* encodes a 319-kDa protein involved in the production of beta-(1----2)-glucan. J  
849 Biol Chem. 1990;265: 2843–2851.
- 850 52. Griffiths JS, Carlyon RE, Erickson JH, Moulton JL, Barnett MJ, Toman CJ, et al. A  
851 *Sinorhizobium meliloti* osmosensory two-component system required for cyclic glucan  
852 export and symbiosis. Mol Microbiol. 2008;69: 479–490.
- 853 53. Carlyon RE, Ryther JL, VanYperen RD, Griffiths JS. FeuN, a novel modulator of two-  
854 component signalling identified in *Sinorhizobium meliloti*. Mol Microbiol. 2010;77: 170–  
855 182. doi:10.1111/j.1365-2958.2010.07198.x
- 856 54. Finan TM, Kunkel B, De Vos GF, Signer ER. Second symbiotic megaplasmid in  
857 *Rhizobium meliloti* carrying exopolysaccharide and thiamine synthesis genes. J Bacteriol.  
858 1986;167: 66–72.
- 859 55. Ferguson GP, Roop RM, Walker GC. Deficiency of a *Sinorhizobium meliloti bacA* mutant  
860 in alfalfa symbiosis correlates with alteration of the cell envelope. J Bacteriol. 2002;184:  
861 5625–5632. doi:10.1128/JB.184.20.5625-5632.2002
- 862 56. Chan CH, Levar CE, Jiménez-Otero F, Bond DR. Genome scale mutational analysis of  
863 *Geobacter sulfurreducens* reveals distinct molecular mechanisms for respiration and  
864 sensing of poised electrodes vs. Fe(III) oxides. J Bacteriol. 2017;: JB.00340–17.  
865 doi:10.1128/JB.00340-17
- 866 57. Arnold MFF, Shabab M, Penterman J, Boehme KL, Griffiths JS, Walker GC. Genome-

- 867 wide sensitivity analysis of the microsymbiont *Sinorhizobium meliloti* to symbiotically  
868 important, defensin-like host peptides. *mBio*. 2017;8: e01060–17.  
869 doi:10.1128/mBio.01060-17
- 870 58. Yang H, Krumholz EW, Brutinel ED, Palani NP, Sadowsky MJ, Odlyzko AM, et al.  
871 Genome-scale metabolic network validation of *Shewanella oneidensis* using transposon  
872 insertion frequency analysis. *PLOS Comput Biol*. 2014;10: e1003848.  
873 doi:10.1371/journal.pcbi.1003848
- 874 59. Broddrick JT, Rubin BE, Welkie DG, Du N, Mih N, Diamond S, et al. Unique attributes of  
875 cyanobacterial metabolism revealed by improved genome-scale metabolic modeling and  
876 essential gene analysis. *Proc Natl Acad Sci USA*. 2016;113: E8344–E8353.  
877 doi:10.1073/pnas.1613446113
- 878 60. Bartell JA, Blazier AS, Yen P, Thøgersen JC, Jelsbak L, Goldberg JB, et al. Reconstruction  
879 of the metabolic network of *Pseudomonas aeruginosa* to interrogate virulence factor  
880 synthesis. *Nat Commun*. 2017;8: 14631. doi:10.1038/ncomms14631
- 881 61. Senior NJ, Sasidharan K, Saint RJ, Scott AE, Sarkar-Tyson M, Ireland PM, et al. An  
882 integrated computational-experimental approach reveals *Yersinia pestis* genes essential  
883 across a narrow or a broad range of environmental conditions. *BMC Microbiol*. 2017;17:  
884 163. doi:10.1186/s12866-017-1073-8
- 885 62. Burger BT, Imam S, Scarborough MJ, Noguera DR, Donohue TJ. Combining genome-  
886 scale experimental and computational methods to identify essential genes in *Rhodobacter*  
887 *sphaeroides*. *mSystems*. 2017;2: e00015–17. doi:10.1128/mSystems.00015-17
- 888 63. Griffiths JS, Long SR. A symbiotic mutant of *Sinorhizobium meliloti* reveals a novel  
889 genetic pathway involving succinoglycan biosynthetic functions. *Mol Microbiol*. 2008;67:

- 890 1292–1306. doi:10.1111/j.1365-2958.2008.06123.x
- 891 64. Sambrook J, Fritsch EF, Maniatis T. Molecular cloning: a laboratory manual. New York:  
892 Cold Spring Harbor Laboratory Press; 1989.
- 893 65. Martin MO, Long SR. Generalized transduction in *Rhizobium meliloti*. J Bacteriol.  
894 1984;159: 125–129.
- 895 66. Ferrières L, Hémerly G, Nham T, Guérout A-M, Mazel D, Beloin C, et al. Silent mischief:  
896 bacteriophage Mu insertions contaminate products of *Escherichia coli* random mutagenesis  
897 performed using suicidal transposon delivery plasmids mobilized by broad-host-range RP4  
898 conjugative machinery. J Bacteriol. 2010;192: 6418–6427. doi:10.1128/JB.00621-10
- 899 67. Fraley C, Raftery AE, Murphy TB, Scrucca L. mclust Version 4 for R: Normal mixture  
900 modeling for model-based clustering, classification, and density estimation. Washington,  
901 USA: Department of Statistics, University of Washington; 2012.
- 902 68. Bodenhofer U, Kothmeier A, Hochreiter S. APCluster: an R package for affinity  
903 propagation clustering. Bioinformatics. 2011;27: 2463–2464.  
904 doi:10.1093/bioinformatics/btr406
- 905 69. Robinson JT, Thorvaldsdóttir H, Winckler W, Guttman M, Lander ES, Getz G, et al.  
906 Integrative genomics viewer. Nat Biotechnol. 2011;29: 24–26. doi:10.1038/nbt.1754
- 907 70. Wickham H. ggplot2: elegant graphics for data analysis.[Internet]. 2009. New York, USA:  
908 Springer-Verlag; 2009.
- 909 71. Chen H, Boutros PC. VennDiagram: a package for the generation of highly-customizable  
910 Venn and Euler diagrams in R. BMC Bioinform. 2011;12: 35. doi:10.1186/1471-2105-12-  
911 35
- 912 72. Krzywinski M, Schein J, Birol I, Connors J, Gascoyne R, Horsman D, et al. Circos: an



- 913 information aesthetic for comparative genomics. *Genome Res.* 2009;19: 1639–1645.  
914 doi:10.1101/gr.092759.109
- 915 73. Mrázek J, Karlin S. Strand compositional asymmetry in bacterial and large viral genomes.  
916 *Proc Natl Acad Sci USA.* 1998;95: 3720–3725.
- 917 74. Yamada T, Letunic I, Okuda S, Kanehisa M, Bork P. iPath2.0: interactive pathway  
918 explorer. *Nucleic Acids Res.* 2011;39: W412–5. doi:10.1093/nar/gkr313
- 919 75. Eddy SR. A new generation of homology search tools based on probabilistic inference.  
920 *Genome Inform.* 2009;23: 205–211.
- 921 76. Wheeler TJ, Clements J, Finn RD. Skyalign: a tool for creating informative, interactive  
922 logos representing sequence alignments and profile hidden Markov models. *BMC*  
923 *Bioinform.* 2014;15: 1. doi:10.1186/1471-2105-15-7
- 924 77. diCenzo GC, Zamani M, Ludwig HN, Finan TM. Heterologous complementation reveals a  
925 specialized activity for BacA in the *Medicago-Sinorhizobium meliloti* symbiosis. *Mol Plant*  
926 *Microbe Interact.* 2017;30: 312-324. doi:10.1094/MPMI-02-17-0030-R
- 927 78. Camacho C, Coulouris G, Avagyan V, Ma N, Papadopoulos J, Bealer K, et al. BLAST+:  
928 architecture and applications. *BMC Bioinform.* 2009;10: 421. doi:10.1186/1471-2105-10-  
929 421
- 930 79. Schellenberger J, Que R, Fleming RMT, Thiele I, Orth JD, Feist AM, et al. Quantitative  
931 prediction of cellular metabolism with constraint-based models: the COBRA Toolbox v2.0.  
932 *Nat Protoc.* 2011;6: 1290–1307. doi:10.1038/nprot.2011.308
- 933 80. Keating SM, Bornstein BJ, Finney A, Hucka M. SBMLToolbox: an SBML toolbox for  
934 MATLAB users. *Bioinformatics.* 2006;22: 1275–1277. doi:10.1093/bioinformatics/btl111
- 935 81. Bornstein BJ, Keating SM, Jouraku A, Hucka M. LibSBML: an API library for SBML.

- 936 Bioinformatics. 2008;24: 880–881. doi:10.1093/bioinformatics/btn051
- 937 82. Young JPW, Crossman LC, Johnston AW, Thomson NR, Ghazoui ZF, Hull KH, et al. The  
938 genome of *Rhizobium leguminosarum* has recognizable core and accessory components.  
939 Genome Biol. 2006;7: R34. doi:10.1186/gb-2006-7-4-r34
- 940 83. Kanehisa M, Sato Y, Kawashima M, Furumichi M, Tanabe M. KEGG as a reference  
941 resource for gene and protein annotation. Nucleic Acids Res. 2016;44: D457–D462.  
942 doi:10.1093/nar/gkv1070
- 943 84. Basconcello LS, Zaheer R, Finan TM, McCarry BE. A shotgun lipidomics study of a  
944 putative lysophosphatidic acid acyl transferase (PlsC) in *Sinorhizobium meliloti*. J  
945 Chromatogr B. 2009;877: 2873–2882. doi:10.1016/j.jchromb.2009.05.014
- 946 85. Thorvaldsdóttir H, Robinson JT, Mesirov JP. Integrative Genomics Viewer (IGV): high-  
947 performance genomics data visualization and exploration. Brief Bioinformatics. 2013;14:  
948 178–192. doi:10.1093/bib/bbs017
- 949 86. Yuan Z-C, Zaheer R, Finan TM. Regulation and properties of PstSCAB, a high-affinity,  
950 high-velocity phosphate transport system of *Sinorhizobium meliloti*. J Bacteriol. 2006;188:  
951 1089–1102. doi:10.1128/JB.188.3.1089-1102.2006
- 952 87. diCenzo GC, Sharthiya H, Nanda A, Zamani M, Finan TM. PhoU allows rapid adaptation  
953 to high phosphate concentrations by modulating PstSCAB transport rate in *Sinorhizobium*  
954 *meliloti*. J Bacteriol. 2017;: JB.00143–17. doi:10.1128/JB.00143-17
- 955 88. diCenzo GC, Muhammed Z, Østerås M, O'Brien SAP, Finan TM. A key regulator of the  
956 glycolytic and gluconeogenic central metabolic pathways in *Sinorhizobium meliloti*.  
957 Genetics. 2017;: [epub ahead of print]. doi:10.1534/genetics.117.300212
- 958

959 **Table 1. Fitness classification of chromosomal genes.** Genes were ranked from lowest to highest GEI, with the lowest GEI being at  
 960 the 0 percentile and the highest GEI being at the 100<sup>th</sup> percentile. The approximate break points for the groupings, determined as  
 961 described in the Materials and Methods, are shown for each condition.

| Group | Description                | GEI percentile range   |                              |                           |                                 |
|-------|----------------------------|------------------------|------------------------------|---------------------------|---------------------------------|
|       |                            | Wild type, rich medium | $\Delta$ pSymAB, rich medium | Wild type, defined medium | $\Delta$ pSymAB, defined medium |
| I     | Essential                  | 0-12                   | 0-14                         | 0-12                      | 0-14                            |
| II    | Strong growth defect       | 12-17                  | 14-23                        | 12-18                     | 14-24                           |
| III   | Moderate growth defect     | 17-36                  | 23-49                        | 18-28                     | 24-47                           |
| IV    | Little to no growth impact | 36-100                 | 49-96                        | 28-99                     | 47-99                           |
| V     | Growth improvement         | N/A                    | 96-100                       | 99-100                    | 99-100                          |

962 **Table 2. Sample genes showing strain specific phenotypes.** The top ten genes from each of the indicated groupings, as determined  
 963 based on the ratio of GEI scores of the two strains, are shown. GEI (Gene Essentiality Index) scores are shown first for the wild type  
 964 (WT) followed by the scores for the  $\Delta$ pSymAB (dAB) strain.

| Gene                                                          | Function                               | GEI<br>(WT ... dAB) | Gene                                                             | Function                                  | GEI<br>(WT ... dAB) |
|---------------------------------------------------------------|----------------------------------------|---------------------|------------------------------------------------------------------|-------------------------------------------|---------------------|
| <b>More Important <math>\Delta</math>pSymAB - Rich Medium</b> |                                        |                     | <b>More Important <math>\Delta</math>pSymAB - Defined Medium</b> |                                           |                     |
| <i>kpsF3</i>                                                  | capsule expression protein             | 5.951 ... 0.002     | <i>smc03782</i>                                                  | signal peptide protein                    | 9.670 ... 0.001     |
| <i>groEL</i>                                                  | chaperonin GroEL                       | 2.926 ... 0.001     | <i>amiC</i>                                                      | N-acetylmuramoyl-L-alanine amidase        | 12.273 ... 0.003    |
| <i>aidB</i>                                                   | oxidoreductase                         | 2.658 ... 0.001     | <i>groEL</i>                                                     | chaperonin GroEL                          | 2.755 ... 0.001     |
| <i>proA</i>                                                   | $\gamma$ -glutamyl phosphate reductase | 4.505 ... 0.001     | <i>amn</i>                                                       | AMP nucleosidase                          | 2.200 ... 0.001     |
| <i>amiC</i>                                                   | N-acetylmuramoyl-L-alanine amidase     | 2.016 ... 0.002     | <i>ndvA</i>                                                      | cyclic beta-1,2-glucan ABc transporter    | 1.434 ... 0.001     |
| <i>smc03782</i>                                               | signal peptide protein                 | 1.847 ... 0.001     | <i>smc02495</i>                                                  | translaldolase                            | 3.933 ... 0.003     |
| <i>etfA1</i>                                                  | electron transfer flavoprotein         | 2.447 ... 0.002     | <i>glnA</i>                                                      | glutamine synthetase                      | 2.535 ... 0.002     |
| <i>smc02495</i>                                               | translaldolase                         | 3.127 ... 0.003     | <i>glmS</i>                                                      | glucosamine--fructose-6P aminotransferase | 1.918 ... 0.002     |
| <i>exoN2</i>                                                  | UTP--glucose-1P uridylyltransferase    | 2.292 ... 0.002     | <i>smc00717</i>                                                  | ABC transporter ATP-binding protein       | 6.624 ... 0.006     |
| <i>glnA</i>                                                   | glutamine synthetase                   | 2.153 ... 0.002     | <i>etfA1</i>                                                     | electron transfer flavoprotein            | 2.156 ... 0.002     |
| <b>More Important Wild Type - Rich Medium</b>                 |                                        |                     | <b>More Important Wild Type - Defined Medium</b>                 |                                           |                     |
| <i>carB</i>                                                   | carbamoyl phosphate synthase           | 0.001 ... 1.930     | <i>folD2</i>                                                     | 5,10-methylene-THF dehydrogenase          | 0.003 ... 1.026     |
| <i>argG</i>                                                   | argininosuccinate synthase             | 0.002 ... 1.281     | <i>nuoK1</i>                                                     | NADH dehydrogenase subunit K              | 0.006 ... 1.476     |
| <i>carA</i>                                                   | carbamoyl phosphate synthase           | 0.007 ... 3.928     | <i>prfC</i>                                                      | peptide chain release factor RF-3 protein | 0.001 ... 0.232     |
| <i>purB</i>                                                   | adenylosuccinate lyase                 | 0.002 ... 0.799     | <i>smc00714</i>                                                  | 1-acyl-SN-glycerol-3P acyltransferase     | 0.005 ... 0.522     |
| <i>hrm</i>                                                    | histone-like protein                   | 0.011 ... 2.586     | <i>fpr</i>                                                       | ferredoxin--NADP reductase                | 0.002 ... 0.248     |
| <i>nuoK1</i>                                                  | NADH dehydrogenase subunit K           | 0.006 ... 1.330     | <i>smc00532</i>                                                  | hypothetical protein                      | 0.002 ... 0.203     |
| <i>folD2</i>                                                  | 5,10-methylene-THF dehydrogenase       | 0.018 ... 3.110     | <i>ubiE</i>                                                      | ubiquinone biosynthesis methyltransferase | 0.002 ... 0.209     |
| <i>coaA</i>                                                   | pantothenate kinase                    | 0.004 ... 0.595     | <i>asd</i>                                                       | aspartate-semialdehyde dehydrogenase      | 0.002 ... 0.157     |
| <i>argF1</i>                                                  | ornithine carbamoyltransferase         | 0.012 ... 1.776     | <i>secE</i>                                                      | preprotein translocase subunit SecE       | 0.010 ... 0.796     |
| <i>smc00914</i>                                               | oxidoreductase                         | 0.002 ... 0.240     | <i>smc01038</i>                                                  | hypothetical protein                      | 0.040 ... 2.940     |

965 **Table 3. Summary of iGD726.** The last column indicates reactions whose genes associations are supported by the Tn-seq data of this  
 966 study. Percentage of all reactions in that category are indicated in brackets.

| Pathways                                                        | Genes | Reactions | Reactions supported by Tn-seq |
|-----------------------------------------------------------------|-------|-----------|-------------------------------|
| Overall                                                         | 726   | 681       | 444 (65%)                     |
| Carbon metabolism, oxidative phosphorylation                    | 105   | 54        | 37 (69%)                      |
| Amino acid metabolism                                           | 116   | 93        | 72 (77%)                      |
| Nucleotide metabolism                                           | 34    | 40        | 39 (98%)                      |
| Fatty acid, lipid metabolism                                    | 42    | 227       | 143 (63%)                     |
| Peptidoglycan, lipopolysaccharide, exopolysaccharide metabolism | 47    | 43        | 27 (63%)                      |
| Nucleotide sugar metabolism                                     | 25    | 17        | 6 (35%)                       |
| Vitamin, cofactor, coenzyme metabolism                          | 109   | 121       | 83 (69%)                      |
| Miscellaneous metabolism                                        | 23    | 15        | 7 (47%)                       |
| Transcription, translation, DNA replication, cell division      | 153   | 29        | 28 (97%)                      |
| Transport reactions                                             | 75    | 21        | 3 (14%)                       |
| Exchange reactions                                              | 0     | 21        | N/A                           |

967

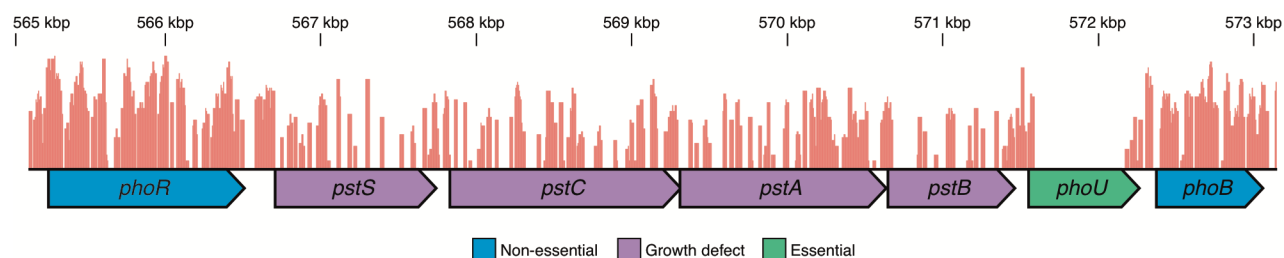

968  
969 **Figure 1. Visualization of the location of transposon insertion sites.** An image of the *pst* locus of *S. meliloti*  
970 generated using the Integrative Genomics Viewer [85]. Chromosomal nucleotide positions are indicated along the  
971 top of the image, and the location of transposon insertions are indicated by the red bars. Non-essential genes contain  
972 a high density of transposon insertions, whereas essential genes have few to no transposon insertions. Genes are  
973 color coded based on their fitness classification, and transcripts are indicated by the arrows below the genes. The  
974 *pstS*, *pstC*, *pstA*, *pstB*, *phoU*, and *phoB* genes are co-transcribed as a single operon [86], and previous work  
975 demonstrated that polar *phoU* mutations are lethal in *S. meliloti*, whereas non-polar mutations are not lethal [87].  
976 The lack of insertions within the *phoU* coding region is therefore consistent with the non-polar nature of the  
977 transposon.

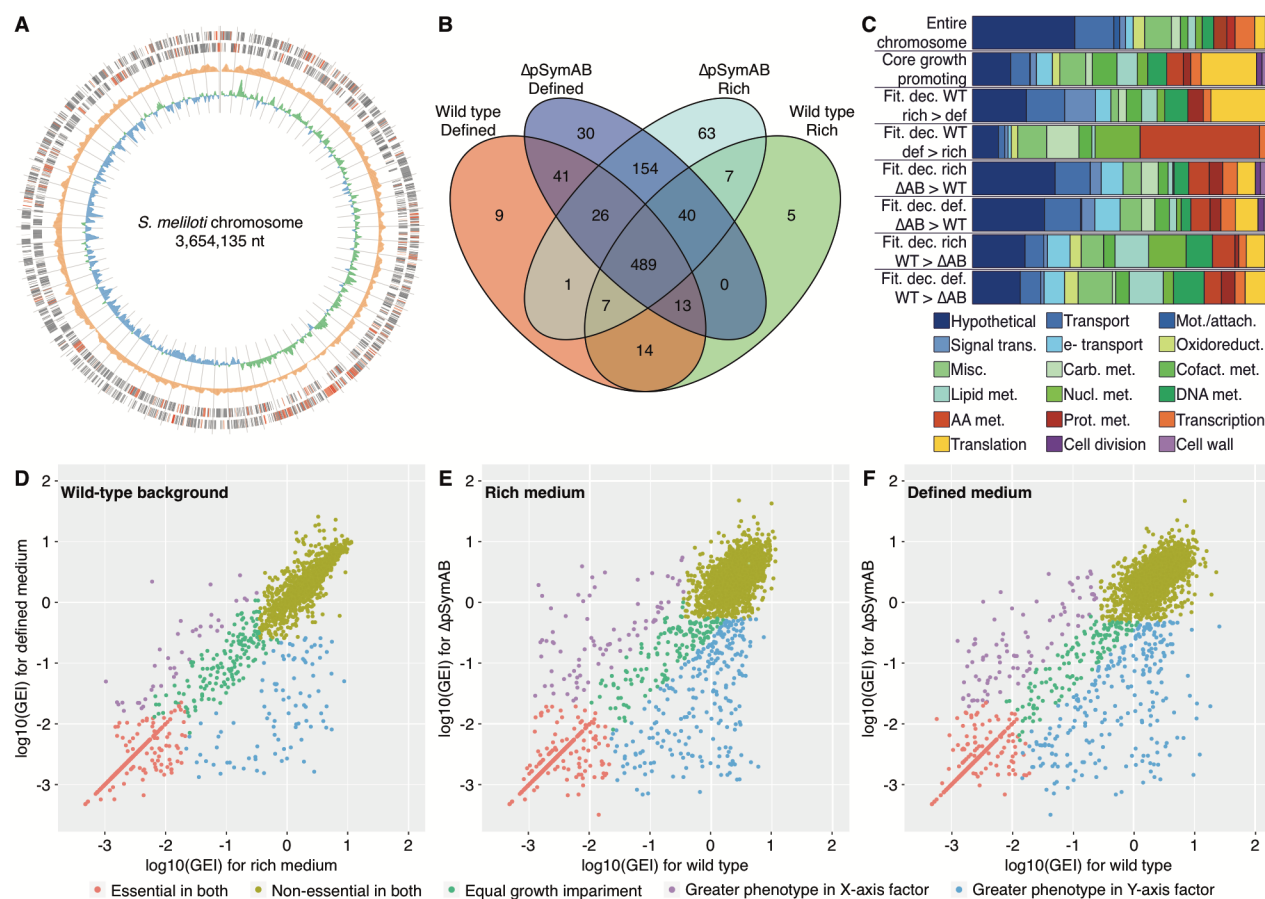

978  
 979 **Figure 2. Characteristics of the core genetic components of *S. meliloti*.** (A) A plot of the *S. meliloti* chromosome  
 980 is shown. From the outside to inside: positive strand coding regions, negative strand coding regions, total insertion  
 981 density, and GC skew. For the positive and negative strands, red lines indicate the core 489 growth promoting genes.  
 982 The insertion density displays the total transposon insertions across all experiments over a 10,000-bp window. The  
 983 GC skew was calculated over a 10,000-bp window, with green showing a positive skew and blue showing a negative  
 984 skew. Tick marks are every 50,000 bp. (B) A comparison of the overlap between the growth promoting genome  
 985 (Group I and II genes) of each Tn-seq data set. Each data set is labelled with the strain (wild type or  $\Delta pSymAB$ ) and  
 986 the growth medium (defined medium or rich medium). (C) Functional enrichment plots for the indicated gene sets.  
 987 Name abbreviations: Fit – fitness; Dec – decrease; WT – wild type;  $\Delta AB$  -  $\Delta pSymAB$ ; Def – defined medium; Rich  
 988 – rich medium. For example, ‘Fit. dec. WT def > rich’ means the genes with a greater fitness decrease in wild type  
 989 grown in defined medium compared to rich medium. Legend abbreviations: AA – amino acid; Attach – attachment;  
 990 Carb – carbohydrate; Cofact – cofactor; e- – electron; Met – metabolism; Misc – miscellaneous; Mot – motility;  
 991 Nucl – nucleotide; Oxidoreduct – oxidoreductase activity; Prot – protein; Trans – transduction. (D-F) Scatter plots  
 992 comparing the fitness phenotypes, shown as the  $\log_{10}$  of the GEI scores (Gene Essentiality Index scores; i.e., number  
 993 of insertions within the gene divided by gene length in nucleotides) of (D) wild type grown in rich medium versus  
 994 wild type grown in defined medium, (E) wild type grown in rich medium versus  $\Delta pSymAB$  grown in rich medium,  
 995 and (F) wild type grown in defined medium versus  $\Delta pSymAB$  grown in defined medium.

996  
997  
998  
999  
1000  
1001  
1002  
1003  
1004  
1005  
1006  
1007

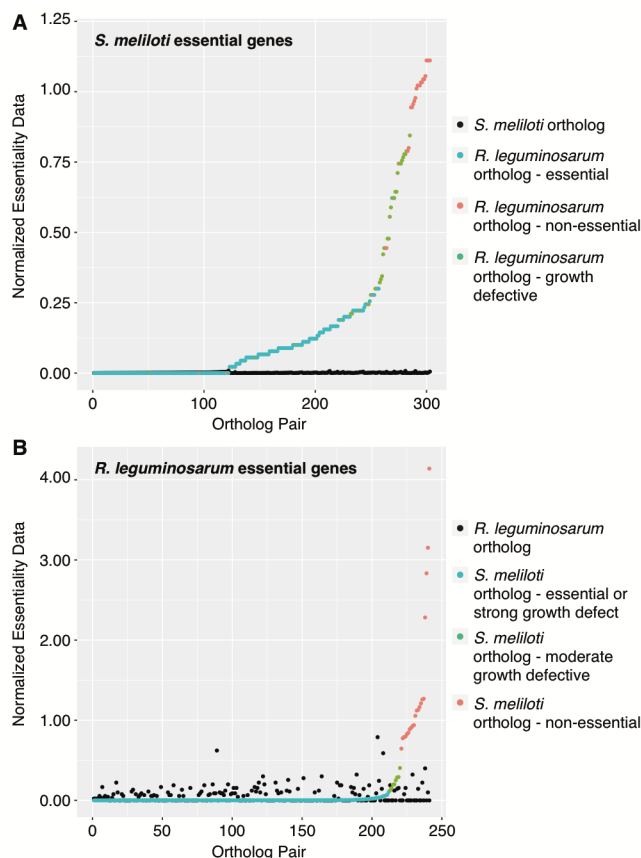

1008 **Figure 3. Comparison of *S. meliloti* and *R. leguminosarum* Tn-seq data.** (A) The fitness phenotypes of essential  
1009 *S. meliloti* genes, as determined in this study, is compared to the fitness phenotypes of the orthologous *R.*  
1010 *leguminosarum* genes, as determined by Perry *et al.* [32]. *S. meliloti* orthologs are shown in black, while the *R.*  
1011 *leguminosarum* orthologs are colored according to their classification by Perry *et al.* [32]. (B) The fitness  
1012 phenotypes of essential *R. leguminosarum* genes is compared to the fitness phenotypes of the orthologous *S. meliloti*  
1013 genes. *R. leguminosarum* orthologs are shown in black, while the *S. meliloti* orthologs are colored according to their  
1014 classification in this study. (A,B) Normalized fitness values are used to facilitate direct comparison between the  
1015 studies as different output statistics were calculated. For *S. meliloti*, the GEI score of each gene for wild type grown  
1016 in minimal medium broth was divided by the median GEI for all genes under the same conditions. For *R.*  
1017 *leguminosarum*, the insertion density of each gene during growth on minimal medium plates was divided by the  
1018 median insertion density of all strains.



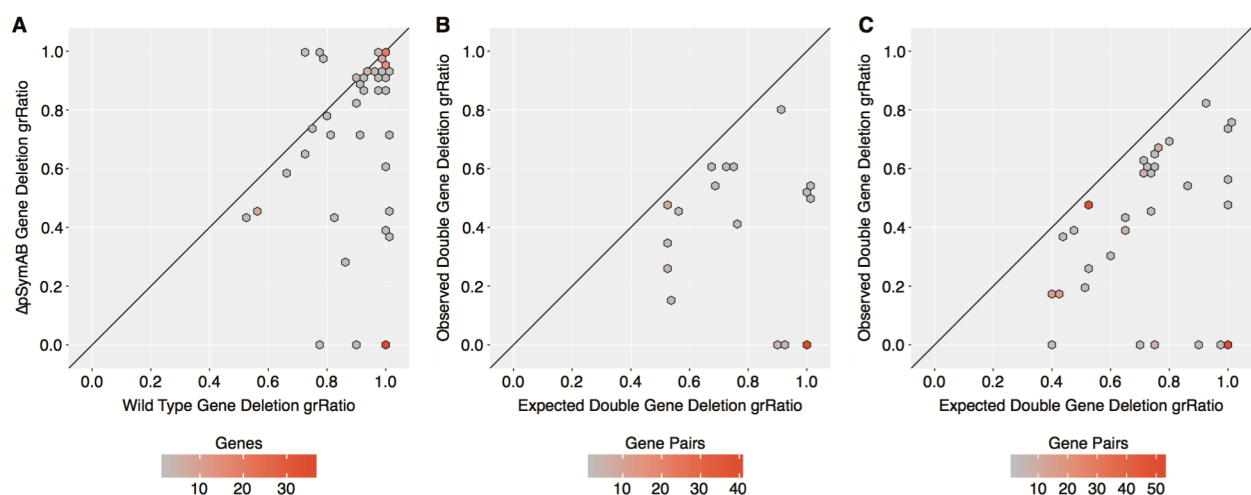

1019  
1020 **Figure 4. *In silico* analysis of genetic redundancy in *S. meliloti*.** The effects of single or double gene deletion  
1021 mutants were predicted *in silico* with the genome-scale *S. meliloti* metabolic model. (A) A scatter plot comparing the  
1022 grRatio (growth rate of mutant / growth rate of non-mutant) for gene deletion mutations in the presence (wild type)  
1023 versus absence ( $\Delta$ pSymAB) of the pSymA/pSymB model genes. Genes whose deletion had either no effect or were  
1024 lethal in both cases are not shown. (B) A scatter plot comparing the grRatio for each double gene deletion pair  
1025 (where one gene was on the chromosome and the other on pSymA or pSymB) observed *in silico* versus the predicted  
1026 grRatio based on the grRatio of the single deletions ( $\text{grRatio}_1 * \text{grRatio}_2$ ). Only gene pairs with an observed grRatio  
1027 at least 10% less than the expected are shown. (C) A scatter plot comparing the grRatio for each double gene  
1028 deletion pair (both genes on the chromosome) observed *in silico* versus the predicted grRatio. Only gene pairs with  
1029 an observed grRatio at least 10% less than the expected are shown. (A-C) The color of each hexagon is  
1030 representative of the number of reactions plotted at that location, as illustrated by the density bar below each panel.  
1031 The diagonal line serves as a reference line.

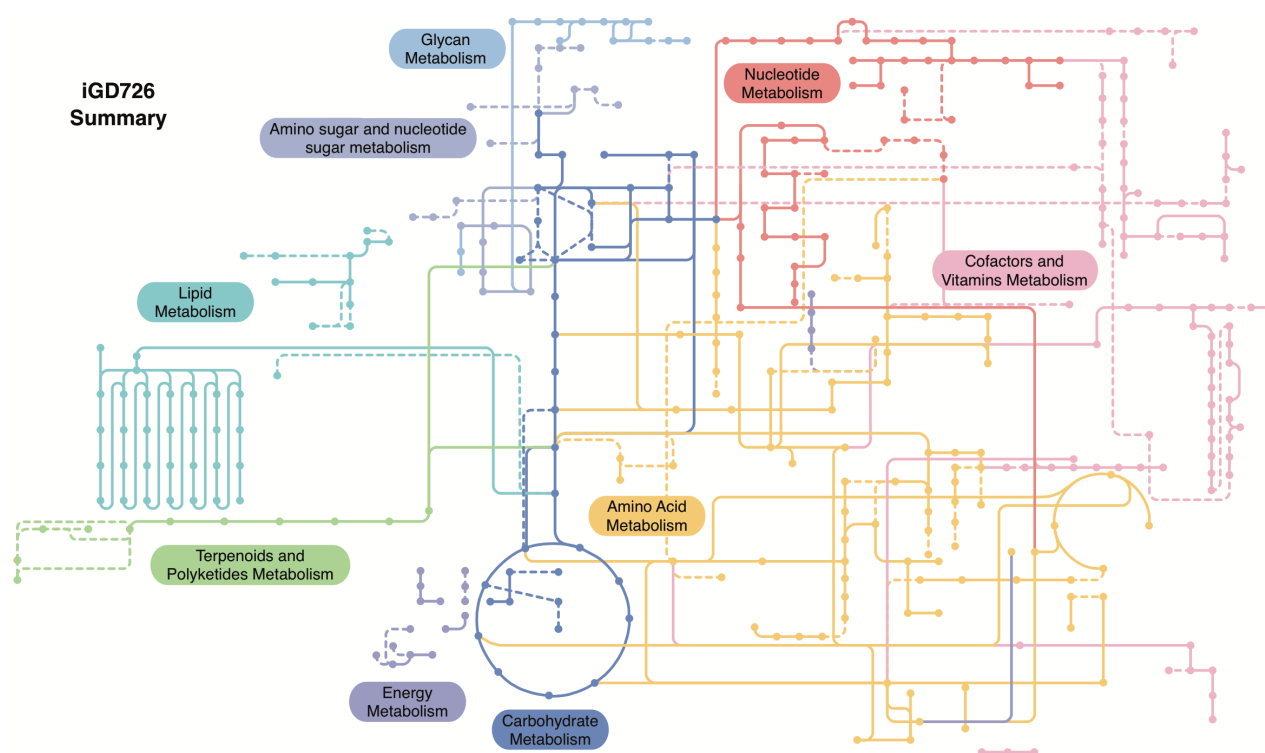

1032  
1033 **Figure 5. Summary schematic of core *S. meliloti* metabolism.** The iGD726 core metabolic model was visualized  
1034 using the iPath v2.0 webserver [74], which maps the reactions of the metabolic model to KEGG metabolic  
1035 pathways; it therefore does not capture metabolism not present in the KEGG pathways included in iPath. Reactions  
1036 and metabolites are colour coded according to their biological role, as indicated. Reactions whose associated genes  
1037 were not identified as growth promoting in this study are in dashed lines.

1038  
1039  
1040  
1041  
1042  
1043  
1044  
1045  
1046  
1047  
1048  
1049  
1050  
1051  
1052  
1053  
1054  
1055  
1056  
1057

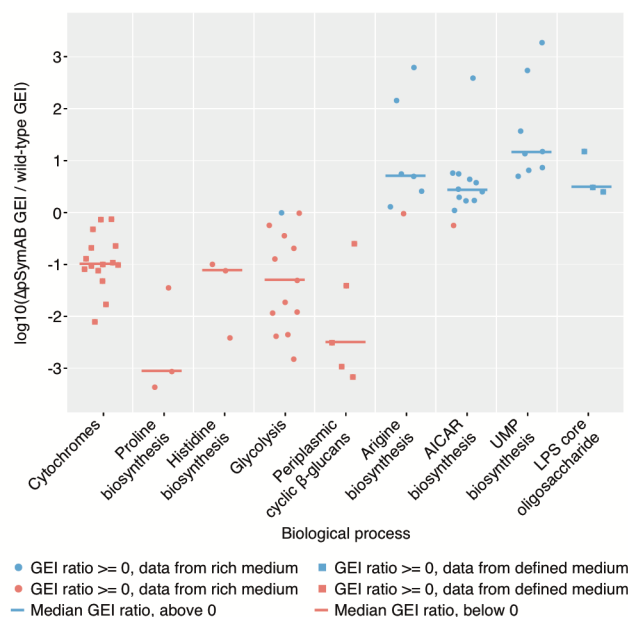

**Figure 6. Gene essentiality index (GEI) changes for genes of selected biological pathways.** Each circle or square represents an individual gene, and shows the log<sub>10</sub> of the ratio of the GEI for that gene in the ΔpSymAB background compared to the wild-type background. Lines indicate the median value of all genes included from the biological process. The underlying data is given in Table S9. Genes included in each process are as follows: Cytochrome C oxidase related genes – *ctaB*, *ctaC*, *ctaD*, *ctaE*, *ctaG*, *ccsA*, *cycH*, *cycJ*, *cycK*, *cycL*, *ccmA*, *ccmB*, *ccmC*, *ccmD*, *ccmG*; Proline biosynthesis – *proA*, *proB1*, *proC*; Histidine biosynthesis – *hisB*, *hisD*, *smc04042*; Glycolysis and related genes – *glk*, *frk*, *pgi*, *zwf*, *pgl*, *edd*, *eda2*, *gap*, *pgk*, *gpmA*, *eno*, *pykA*, *pyc*; Periplasmic cyclic β-glucan biosynthesis – *feuN*, *feuP*, *feuQ*, *ndvA*, *ndvB*; Arginine biosynthesis – *argB*, *argC*, *argD*, *argF1*, *argG*, *argH1*, *argJ*; AICAR biosynthesis – *purB*, *purC*, *purD*, *purE*, *purF*, *purH*, *purK*, *purL*, *purM*, *purN*, *purQ*, *smc00494*; UMP biosynthesis – *carA*, *carB*, *pyrB*, *pyrC*, *pyrD*, *pyrE*, *pyrF*, *smc01361*; LPS core oligosaccharide biosynthesis – *lpsC*, *lpsD*, *lpsE*.
